1 **Heterologous glycosyl hydrolase expression and cellular reprogramming**  
2 **resembling sucrose-induction enable *Zymomonas mobilis* growth on cellobiose**

3

4 **Nagendra P. Kurumbang<sup>1</sup>, Jessica M. Vera<sup>1</sup>, Alexander S. Hebert<sup>2</sup>, Joshua J. Coon<sup>2,3</sup>, and**  
5 **Robert Landick<sup>1,4\*</sup>**

6 <sup>1</sup>DOE Great Lakes Bioenergy Research Center, <sup>2</sup>Genome Center of Wisconsin, <sup>3</sup>Departments of  
7 Chemistry and Biomolecular Chemistry, <sup>4</sup>Departments of Biochemistry and Bacteriology,  
8 University of Wisconsin-Madison, Wisconsin 53726, United States

9 \*To whom correspondence should be addressed; Email: rlandick@wisc.edu; ORCID: 0000-  
10 0002-5042-0383

11

12 **Short title:** Glycosyl hydrolase expression enables *Zymomonas mobilis* growth on cellobiose

13

14 **Keywords:** Cellobiose utilization, Glycosyl hydrolase, *Z. mobilis* ZM4, Serial transfer,  
15 Oligosaccharide conversion, Biofuels

16

## 17 **ABSTRACT**

18 Plant derived fuels and chemicals from renewable biomass have significant potential to replace  
19 reliance on petroleum and improve global carbon balance. However, plant biomass contains  
20 significant fractions of oligosaccharides that are not usable natively by many industrial  
21 microorganisms, including *Escherichia coli*, *Saccharomyces cerevisiae*, and *Zymomonas mobilis*.  
22 Even after chemical or enzymatic hydrolysis, some carbohydrate remains as non-metabolizable  
23 oligosaccharides (*e.g.*, cellobiose or longer cellulose-derived oligomers), thus reducing the  
24 efficiency of conversion to useful products. To begin to address this problem for *Z. mobilis*, we  
25 engineered a strain (*Z. mobilis* GH3) that expresses a glycosyl hydrolase (GH) with  $\beta$ -  
26 glucosidase activity from *Caulobacter crescentus* and subjected it to an adaptation in cellobiose  
27 medium. Growth on cellobiose was achieved after a prolonged lag phase in cellobiose medium  
28 that induced changes in gene expression and cell composition, including increased expression  
29 and secretion of GH. These changes were reversible upon growth in glucose-containing medium,  
30 meaning they did not result from genetic mutation but could be retained upon transfer of cells to  
31 fresh cellobiose medium. After adaptation to cellobiose, our GH-expressing strain was able to  
32 convert about 50% of cellobiose to glucose within 24 hours and use it for growth and ethanol  
33 production. Alternatively, pre-growth of *Z. mobilis* GH3 in sucrose medium enabled immediate  
34 growth on cellobiose. Proteomic analysis of cellobiose- and sucrose-adapted strains revealed  
35 upregulation of secretion-, transport-, and outer membrane-related proteins, which may aid  
36 secretion or surface display of GHs, entry of cellobiose into the periplasm, or both. Our two key  
37 findings are that *Z. mobilis* can be reprogrammed to grow on cellobiose as a sole carbon source  
38 and that this reprogramming is related to a natural response of *Z. mobilis* to sucrose that enables  
39 sucrose secretion.

## 40 INTRODUCTION

41 Advances in synthetic biology and lignocellulosic hydrolysate production have encouraged  
42 development of the  $\alpha$ -proteobacterium *Zymomonas mobilis* as a platform microbe for production  
43 of renewable biofuels and chemicals (*e.g.*, ethanol, C<sub>4</sub> and C<sub>5</sub> alcohols, or C<sub>5</sub>-C<sub>15</sub> terpenoids)  
44 from lignocellulosic biomass (1-3). Efficient conversion of lignocellulose to biofuels and  
45 bioproducts is essential for the development of sustainable sources of fuels and chemicals that  
46 minimize competition with food production (4). *Z. mobilis* is promising for lignocellulosic  
47 conversions because it rapidly and efficiently converts glucose to ethanol, tolerates high ethanol  
48 concentrations, tolerates other inhibitors present in the lignocellulosic hydrolysates, and has a  
49 small (2.1 Mb) and increasingly well-defined genome amenable to synthetic biology approaches  
50 (5). *Z. mobilis* uses the Entner–Doudoroff pathway for glycolysis, which reduces the amount of  
51 protein synthesis required to convert glucose to pyruvate relative to Embden–Meyerhof–Parnas  
52 glycolysis used by yeast and many other microbes (6). Additionally, fermentation to ethanol is  
53 not tightly linked to cell growth, enabling exceptionally high flux that continues even when cell  
54 growth stops.

55 Despite its potential as a platform microbe for lignocellulosic biofuel production, wild-type  
56 *Z. mobilis* has a limited substrate range consisting of glucose, fructose, and sucrose, and thus  
57 requires engineering to convert the diverse sugar monomers and oligomers present in  
58 lignocellulosic hydrolysates. Engineered strains that convert the 5-carbon sugars xylose (7) and  
59 arabinose (8) or cellobiose (9) to ethanol have been developed, but use of sugar oligomers other  
60 than its native substrate sucrose at levels that support *Z. mobilis* cell growth has not been  
61 reported. Sugar oligomers including cello- and xylo- oligomers can be significant components of  
62 lignocellulosic hydrolysates, representing about 18-25% of total soluble sugars in corn stover

63 hydrolysates, especially when hydrolysates are generated under milder conditions that minimize  
64 inhibitor production or enable recovery of intact lignin (10). Residual glycosyl hydrolases (GHs)  
65 in enzymatically prepared hydrolysates may enable conversion of these oligomers to monomers  
66 as conversion reduces end-product inhibition of GHs, but there is growing interest in enzyme-  
67 free chemical deconstruction methods like those enabled by the renewable solvent  $\gamma$ -  
68 valerolactone (11). These enzyme-free hydrolysates will lack the residual GHs necessary for  
69 continued oligomer hydrolysis during fermentation. Thus, equipping *Z. mobilis* with an ability to  
70 convert sugar oligomers efficiently by production and secretion of GHs would improve prospects  
71 for its use as a platform microbe for lignocellulosic conversions.

72 As cellobiose is the most fundamental unit of these unusable sugar oligomers, we targeted  
73 production and secretion of GHs that would enable efficient cellobiose conversion by *Z. mobilis*  
74 by heterologous expression of *Cellvibrio japonicus* Cel3A and *Caulobacter crescentus*  
75 CC\_0968, both belonging to glycosyl hydrolase family-3 (GH3). We selected Cel3A because it  
76 has already been shown to enable *E. coli* to grow on cellobiose in minimal medium (12).  
77 CC\_0968 was selected because *C. crescentus* is an  $\alpha$ -proteobacterium like *Z. mobilis*. Past  
78 studies have successfully expressed *eglX* endoglucanase from *Pseudomonas fluorescens* var.  
79 *cellulosa* (later reclassified as *Cellvibrio japonicus* sp. nov) (13), *celZ* endoglucanase from  
80 *Erwinia chrysanthemi* (14), and endoglucanase from *Cellulomonas uda* CB4 (15) in *Z. mobilis*.  
81 Two cellulolytic enzymes from *Acidothermus cellulolyticus*, E1 and GH12, were expressed in *Z.*  
82 *mobilis* and their activities verified by a zymogram test with carboxymethyl cellulose (16).  
83 Similarly,  $\beta$ -glucosidase from *Ruminococcus albus* was tagged N-terminally with a signal  
84 peptide from the *Z. mobilis* periplasmic enzyme glucose-fructose oxidoreductase and  
85 overexpressed in *Z. mobilis*, which enabled fermentation of cellobiose to ethanol (9). However,

86 these previous studies only demonstrated cellobiose conversion in resting cells, and heterologous  
87 gene expression in *Z. mobilis* was unable to produce significant growth in cellular biomass using  
88 cellobiose as a carbon source. Growth on oligosaccharides is crucial to enable genetic dissection  
89 of the *Z. mobilis* systems required for GH secretion and the use of selective pressure to improve  
90 GH production and secretion by *Z. mobilis*.

91 Here we report successful expression and secretion of a GH3  $\beta$ -glucosidase encoded by  
92 *CC\_0968* from *Caulobacter crescentus* at levels that enabled growth of *Z. mobilis* on cellobiose  
93 as a sole carbon source. Growth on cellobiose correlated with increased expression and secretion  
94 of GH3, which was induced by prolonged incubation (adaptation) in cellobiose or by exposure to  
95 sucrose medium. Proteomic analysis revealed that both cellobiose and sucrose adaptation  
96 included numerous changes to protein levels relative to growth on glucose that suggest a cellular  
97 remodeling program that enables GH secretion and possibly oligosaccharide transit across the  
98 outer membrane.

99

## 100 **RESULTS**

### 101 **Heterologous expression of GHs in *Escherichia coli* and *Zymomonas***

#### 102 ***mobilis***

103 Two GH-encoding genes, *cel3A* from *Cellvibrio japonicus* and *CC\_0968* (encoding GH3) from  
104 *Caulobacter crescentus*, were cloned and expressed separately from an expression vector,  
105 pVector, which has an isopropyl  $\beta$ -D-1-thiogalactopyranoside (IPTG)-inducible T7A1 promoter  
106 driving GH expression, spectinomycin resistance gene, a Rhodobacter-derived broad host range  
107 origin of replication for *Z. mobilis*, and a pUC *ori* for *E. coli* (**Fig 1A**). *E. coli* DH5 $\alpha$  and *Z.*

108 *mobilis* ZM4 were transformed with pCel3A, pGH3, or control plasmid pVector and tested for  
109 growth in minimal medium containing either cellobiose or glucose as the sole carbon source. As  
110 expected, growth on cellobiose was not observed in either *E. coli* or *Z. mobilis* transformed with  
111 pVector (**Figs 1B and E**). However, for *E. coli* both pCel3A and pGH3 facilitated growth on  
112 cellobiose (**Figs 1C and D**). A corresponding effect was not observed for *Z. mobilis*, for which  
113 neither pCel3A nor pGH3 resulted in growth on cellobiose (**Figs 1F and G**). Both *E. coli* and *Z.*  
114 *mobilis* were able to grow on glucose when transformed with pVector, pCel3A, or pGH3,  
115 indicating that these plasmids do not negatively impact *Z. mobilis* viability (**Figs 1B-G**).  
116 Furthermore, *Z. mobilis* pVector and *Z. mobilis* pGH3 exhibited consistent growth in rich  
117 glucose medium (RMG) supplemented with spectinomycin and IPTG indicating that GH  
118 expression does not induce an inhibitory metabolic or protein synthesis burden in *Z. mobilis*  
119 pGH3 (**S1 Fig**).

120

121 **Figure 1. Expression of different glycosyl hydrolase (GH) genes from a common expression**  
122 **vector backbone and test of their effects on growth of *E. coli* DH5 $\alpha$  in MOPS minimal**  
123 **medium (17) and *Z. mobilis* ZM4 in Zymomonas minimal medium (18) with glucose or**  
124 **cellobiose as a carbon source. (A) Expression of GH genes in a pVector backbone and a**  
125 **summary of the constructs and their effects on growth in minimal medium supplemented with**  
126 **cellobiose. (B-D) Growth of *E. coli* DH5 $\alpha$  containing plasmids pVector or pCel3A or pGH3 in**  
127 **MOPS minimal medium supplied with 0.4% glucose or cellobiose. (E-G) Growth of *Z. mobilis***  
128 **ZM4 containing plasmids pVector or pCel3A or pGH3 in a Zymomonas minimal medium**  
129 **containing 2% glucose or 2% cellobiose. The growth curves are averages of three replicates.**  
130 \*Gene from *Cellvibrio japonicus*, #Gene from *Caulobacter crescentus*.

131

132 ***Non-native glycosyl hydrolases are readily secreted from E. coli but not Z. mobilis***

133 Bacteria express and localize proteins to various subcellular locations. Depending on the  
134 presence or absence of an N-terminal signal sequence and other features, proteins are either  
135 retained in the cytoplasm or localized to different cellular compartments. Secreted proteins may  
136 be targeted to inner membrane, outer membrane (OM), periplasm, or extracellular region  
137 depending on the accessibility of secretory apparatuses, the nature of signal sequences, or both  
138 (19). To determine why heterologous expression of GHs in *Z. mobilis* was unable to support  
139 growth on cellobiose, we tested for differences in expression and localization of the GHs  
140 between *E. coli* and *Z. mobilis*.

141 Extracellular and intracellular fractions of protein were separated as described previously  
142 (20). Briefly, equal numbers of cells (calculated based on culture volume and apparent OD) were  
143 centrifuged, and the cell pellets and supernatants used as the total cell and extracellular fractions.  
144 The periplasmic fraction was recovered after an osmotic shock of an equal portion of cells  
145 incubated in concentrated sucrose solution. The cytoplasmic fraction was obtained by lysis of  
146 osmotically shocked cells (see **Methods**). Using 4-methylumbelliferyl  $\beta$ -D-glucopyranoside  
147 (MUG), a fluorogenic analogue of cellobiose, GH activity was calculated in each protein fraction  
148 by measuring the accumulation of fluorescent reaction product over time using a 96-well plate  
149 reader (**Table 1; Materials and Methods**). Reported GH activity was normalized by the total  
150 protein concentration in the reaction.

151

152 **Table 1. Localization and activity of glycosyl hydrolase expressed in *Z. mobilis* ZM4 and *E.***  
 153 ***coli* DH5 $\alpha$**

| Fractions     | <i>Z. mobilis</i> ZM4 in RMG medium |                 |            | <i>E. coli</i> DH5 $\alpha$ in LB medium |                    |            |
|---------------|-------------------------------------|-----------------|------------|------------------------------------------|--------------------|------------|
|               | ZM4+pVector                         | ZM4+pGH3        | % Activity | DH5 $\alpha$ +pVector                    | DH5 $\alpha$ +pGH3 | % Activity |
|               | GH activity(*U)                     | GH activity(*U) |            | GH activity(*U)                          | GH activity(*U)    |            |
| Culture broth | nd                                  | 2.0 $\pm$ 0.2   | 0.66       | nd                                       | 15 $\pm$ 2         | 10.93      |
| Periplasm     | nd                                  | 210 $\pm$ 30    | 67.96      | nd                                       | 68 $\pm$ 4         | 49.64      |
| Cytoplasm     | nd                                  | 80 $\pm$ 13     | 25.53      | nd                                       | 12 $\pm$ 3         | 8.73       |
| Spheroplast   | nd                                  | 17 $\pm$ 1.2    | 5.48       | nd                                       | 20 $\pm$ 2         | 14.41      |
| Whole pellets | nd                                  | 1.2 $\pm$ 0.1   | 0.37       | nd                                       | 22 $\pm$ 1         | 16.38      |

154 \*U, relative fluorescence signal produced per  $\mu$ g of protein per minute. nd, not detectable. RMG,  
 155 rich medium glucose. LB, Luria-Bertani. Percentage activity was calculated from the ratio of  
 156 activity of each fraction with respect to the total activity of all fractions.

157  
 158 We compared GH activity in *Z. mobilis* transformed with pGH3 encoding the *C.*  
 159 *crescentus* CC\_0968 (called *Z. mobilis* GH3 hereafter), or with pVector, grown in rich medium  
 160 glucose (RMG) to *E. coli* transformed with pGH3, or pVector, grown in Luria-Bertani (LB)  
 161 medium. Among the isolated protein fractions of *Z. mobilis* GH3, GH activity was highest  
 162 (~68%) in the periplasmic fraction, with ~99% of total GH activity localized to intracellular  
 163 fractions (periplasm, spheroplast and cytoplasm). GH activity localization closely followed the  
 164 localization predictions for CC\_0968 by LipoP 1.0 (21) and PSORTb (22) (**S3 Table**). Only a  
 165 small fraction of activity (~1% of total activity) was observed from the extracellular fraction (*i.e.*,  
 166 culture medium; **Table 1**). *E. coli* pGH3 also exhibited about half of total GH activity in the  
 167 periplasm but, in contrast to *Z. mobilis*, significant activity was also present in the culture  
 168 medium and accessible in isolated whole cells (*i.e.*, washed whole cells could hydrolyze assay



169 substrate added to the resuspended cells; **Table 1**). These results suggest that extracellular or  
170 surface-accessible GH activity may be important for growth on cellobiose. Strains containing the  
171 pVector control plasmid did not exhibit GH activity in any fractions, indicating that *Z. mobilis*  
172 ZM4 and *E. coli* DH5 $\alpha$  express little or no endogenous GH activity.

173 Although we detected expression and activity from both *C. crescentus* (pGH3) and *C.*  
174 *japonicus* (pCel3A) enzymes, subsequent experiments demonstrated that only pGH3 enabled  
175 adaptation of *Z. mobilis* for growth on cellobiose. Hence, we report here the subcellular GH  
176 activity for only GH3 from *C. crescentus*.

177

### 178 ***Z. mobilis* growth on cellobiose requires a long adaptation but not genetic mutation**

179 After confirming GH activity in *Z. mobilis* GH3, we tested whether adaptation or selection for  
180 mutations could enable growth on cellobiose. *Z. mobilis* GH3 and a control strain were  
181 inoculated into rich medium 2% cellobiose (RMC) containing 0.4 mM IPTG at ~0.05 apparent  
182 OD<sub>600</sub>. The cultures were incubated at 30°C and monitored for change in turbidity. No growth  
183 was evident for days one to three, whereas cells inoculated into rich medium 2% glucose (RMG)  
184 grew to saturation on day one. After three days, however, *Z. mobilis* GH3 started to grow in  
185 RMC (data not shown). To test whether the long lag could be eliminated by some cell growth to  
186 allow GH accumulation or other changes, we tested the same strains in RMC plus 0.05% glucose  
187 (RMCG). In the presence of 0.05% glucose, cells grew to an apparent OD<sub>600</sub> of ~0.13 at which  
188 point glucose was consumed from the medium. The cells then entered a long (~48 hours) lag  
189 phase before again showing growth (**Fig 2A**). Cells grown in RMCG behaved similarly to cells  
190 grown in RMC such that a long lag phase was necessary before growth on cellobiose could  
191 occur.

192

193 **Figure 2.** Growth and physiological changes induced by adaptation to cellobiose medium. (A)

194 Growth of *Z. mobilis* ZM4 transformed with control pVector or pGH3 in 2% cellobiose medium

195 with 0.05% glucose (RMCG). *Z. mobilis* GH3 growth in RMCG can be described in three stages:

196 initial growth on glucose, a long lag phase, and growth on cellobiose. (B) Growth comparison of

197 *Z. mobilis* GH3 in RMCG. Cells were either adapted to cellobiose, unadapted to cellobiose, or

198 adapted to cellobiose and then regrown in RMG (reRMG). Extracellular (C) and whole-cell (D)

199 GH activity for RMCG-adapted or -unadapted *Z. mobilis* GH3. (E) Extracellular and whole cell

200 GH activity of RMCG-adapted *Z. mobilis* GH3 grown in RMG after adaptation before returning

201 to RMCG. GH activity reported as relative fluorescence signal produced per min normalized by

202 input cell number (apparent OD<sub>600</sub>). Error bars are standard deviations of biological triplicates.

203

204 To determine if growth on cellobiose was enabled by a permanent genetic alteration we

205 grew RMC-adapted and -unadapted *Z. mobilis* GH3 in RMCG+0.4 mM IPTG. As a control, we

206 also grew RMC-adapted *Z. mobilis* GH3 in RMG before returning cells to RMCG+0.4 mM

207 IPTG (reRMG). Washed, RMC-adapted cells inoculated into RMCG no longer exhibited a long

208 lag phase after consumption of glucose but instead continue growing on cellobiose (**Fig 2B**).

209 RMC-unadapted cells exhibited a long lag phase after glucose consumption consistent with

210 previous observations. Interestingly, the RMC-adapted cells grown in RMG before returning to

211 RMCG lagged similarly to RMC-unadapted cells (**Fig 2B**) suggesting that growth on RMG

212 reverted the cells back to a state that required a long lag phase before growth on cellobiose could

213 resume. Based on these observations, we concluded that *Z. mobilis* GH3 adaptation to RMC

214 cannot be attributed to a permanent genetic change. Instead we hypothesized that a slow

215 remodeling of gene expression and cellular state occurs during adaptation (*i.e.*, the long lag  
216 phase) that allows for growth on cellobiose.

217 We also tested the growth of *Z. mobilis* GH3 as colonies on solid agar medium containing  
218 RMC. Cells were struck out on RMC agar plates with or without 0.4 mM IPTG alongside control  
219 cells containing pVector and incubated for 3-6 days at 30 °C. After 3 days, adapted *Z. mobilis*  
220 pGH3 cells grew only in the presence of IPTG (**S2 Fig**), verifying that growth of *Z. mobilis* GH3  
221 on cellobiose requires induction of GH3 synthesis. We also tested heterologous GH3 protein  
222 produced in *Z. mobilis* by comparing GH3 signal produced with and without IPTG. GH3 signal  
223 was increased with IPTG in all samples having GH3 protein in the plasmid (**S3 Fig**). Finally, to  
224 verify production of intact GH3, we visualized the induced GH3 protein by SDS-PAGE as a  
225 distinct, detectable band of ~80 kDa (predicted MW of GH3 after removal of its signal sequence  
226 is 79652 Da) and estimated the extent of induction by densitometry (**S3 Fig**).

227 To understand the changes that allow *Z. mobilis* GH3 to grow on cellobiose, we used MUG  
228 to assay and compare extracellular (supernatant) and whole-cell (pellet) GH activity between  
229 adapted and unadapted cells. RMCG-adapted and unadapted cells were grown in RMC and  
230 samples were collected at zero and 24 hours. At zero hours both adapted and unadapted cells  
231 exhibited low extracellular GH activity. After 24 hours, adapted cells showed a marked increase  
232 in extracellular GH activity, whereas extracellular GH activity remained unchanged for  
233 unadapted cells (**Fig 2C**). Adapted whole cells exhibited higher GH activity than unadapted  
234 whole cells at both zero and 24 hours, with GH activity increasing several fold after 24 hours for  
235 both adapted and unadapted cells (**Fig 2D**). These results further indicate that GH secretion to the  
236 extracellular medium is important for growth on cellobiose. Adapted whole cells also displayed  
237 considerable levels of GH activity, suggesting that adaptation either increased permeability of

238 the OM to the substrate (*i.e.*, MUG or cellobiose) or increased display of GH3 on the cell  
239 surface. Taken together, either greater secretion of GH to the extracellular space, alteration of  
240 OMs, or both appear to contribute to growth on cellobiose.

241 We also measured extracellular and whole cell GH activity of the RMCG-adapted cells that  
242 were regrown in RMG before returning cells to RMC (reRMG). These reRMG cells showed low  
243 levels of extracellular GH activity and only moderate whole cell GH activity on par with  
244 unadapted cells (**Fig 2E**). Based on these findings, we concluded that adaption to RMC consists  
245 of a reversible remodeling of *Z. mobilis* rather than a genetic change that permanently altered the  
246 properties of the cells. When wild-type *Z. mobilis* ZM4 was transformed with plasmids  
247 recovered from RMC-adapted *Z. mobilis* GH3, the newly transformed strain behaved like  
248 unadapted cells, further indicating that the adaptation occurred in the host cell itself and not by  
249 mutation of the plasmid.

250 Having demonstrated that *Z. mobilis* GH3 can grow solely on cellobiose, we next measured  
251 cellobiose conversion to ethanol at successive times during adaptation and growth on cellobiose  
252 (0, 3, 6, 12, 24, 48, 96 and 168 hours after inoculation in RMCG medium). No cellobiose  
253 conversion occurred during the initial growth on glucose or during the approximately 48-hour  
254 adaptation period in *Z. mobilis* GH3. After 48 hours, *Z. mobilis* GH3 began consuming  
255 cellobiose as indicated by depletion of cellobiose from the medium (**S4A Fig**). Cellobiose  
256 depletion coincided with ethanol accumulation, reaching  $3.4 \pm 0.5$  g/L after 168 hours of growth  
257 (**S4B Fig**). No cellobiose conversion was observed at any time for the control strain transformed  
258 with pVector (**S4A Fig**).

259

260 ***Serial transfer of culture also enhanced cellobiose conversion***

261 We also tested cellobiose adaptation of *Z. mobilis* GH3 by serial passage using *Z. mobilis*  
262 pVector as a control (**Fig 3**). The first passage was performed from RMG to RMC with 0.4 mM  
263 IPTG and all subsequent passages performed in RMC+IPTG (**Fig 3A**). To prevent carryover of  
264 extracellular GH between passages, cells were pelleted, washed, and resuspended in fresh  
265 medium. Growth of cells was monitored by measuring apparent OD<sub>600</sub> and the supernatant  
266 collected at the beginning and end of each passage to measure cellobiose depletion and ethanol  
267 accumulation.

268  
269 **Figure 3.** Growth adaptation by serial passage and its effect on growth in cellobiose and ethanol  
270 production. (A) Schematic representation of adaptation showing serial passages of *Z. mobilis*  
271 GH3 and pVector control. Apparent OD<sub>600</sub> was measured for *Z. mobilis* GH3 at the end of each  
272 passage. (B, C, D). Growth of *Z. mobilis* GH3 and pVector control in RMC after first, second,  
273 and third passages. (E, F, G) Cellobiose conversion after first, second, and third passages,  
274 respectively. (H, I, J) Ethanol production after first, second, and third passages, respectively.  
275 Error bars are standard deviations of triplicate experiments.

276  
277 After the first passage to RMC, little to no growth was observed over the course of 3 days  
278 for both *Z. mobilis* pVector and *Z. mobilis* GH3 (**Fig 3B**). After the second passage, *Z. mobilis*  
279 GH3 cell density more than doubled after two days whereas control cells did not grow (**Fig 3C**).  
280 *Z. mobilis* GH3 continued to grow robustly after the third passage with a doubling time of <24  
281 hours (**Fig 3D**). During this serial passage growth of *Z. mobilis* GH3 on cellobiose was  
282 concomitant with cellobiose depletion from the medium (**Figs 3E-G**) and accumulation of

283 ethanol (**Figs 3H-J**). From the serial passage experiment, we conclude that after the second  
284 passage *Z. mobilis* GH3 was able to utilize cellobiose for growth and ethanol production.

285

### 286 ***Growth in sucrose medium enabled growth on cellobiose***

287 Sucrose is a natural disaccharide substrate for *Z. mobilis*, catabolism of which depends on  
288 secreted sucrase(s) (23) and uncharacterized changes in cellular state. Thus, we hypothesized that  
289 exposure to sucrose might induce changes in *Z. mobilis* that enable growth on cellobiose. To test  
290 this hypothesis, we grew *Z. mobilis* GH3 in rich medium containing 2% sucrose (RMS) or RMG  
291 for 48 hours. The cells were then washed and inoculated into the fresh RMC containing 0.1%  
292 sucrose (RMCS) and growth was monitored (**Fig 4A**). We found that sucrose-grown cells  
293 resumed growth efficiently on cellobiose without a long lag phase, similar to RMC-adapted cells  
294 (**Fig 2B**), but neither RMG-grown *Z. mobilis* GH3 nor pVector control cells grew significantly.  
295 However, RMG-grown *Z. mobilis* GH3 did eventually resume growth after a lag, as seen  
296 previously (data not shown). This finding suggests that sucrose can induce changes in *Z. mobilis*  
297 that enable GH3-mediated growth on cellobiose. To investigate the effects of sucrose on GH  
298 activity, we assayed and compared GH activity of cellobiose-, sucrose-, and glucose-grown *Z.*  
299 *mobilis* GH3. We found that both cellobiose- and sucrose-grown cells exhibited higher  
300 extracellular and whole cell GH activity than glucose-grown cells (**S5 Fig**) consistent with our  
301 previous observations of RMC-adapted cells. These results suggest that growth on sucrose  
302 induces a cellular response in *Z. mobilis* that is similar to the remodeling that occurs during RMC  
303 adaptation.

304

305 **Figure 4.** Sucrose adaptation allows *Z. mobilis* GH3 to grow on cellobiose. (A) Growth of  
306 sucrose-adapted *Z. mobilis* GH3, pVector control, and unadapted *Z. mobilis* GH3 in RMC  
307 supplemented with 0.1% sucrose (RMCSuc). (B) Growth of sucrose-adapted and unadapted *Z.*  
308 *mobilis* GH3 and pVector control, in RMC plus sucrose (0.2-0.8%). Gray line, *Z. mobilis*  
309 pVector RMC alone. Black lines, *Z. mobilis* + pVector in RMC+sucrose. Blue lines, *Z. mobilis*  
310 GH3 in RMC+sucrose. Green lines, sucrose-adapted *Z. mobilis* GH3 in RMC+sucrose.

311  
312 To determine the minimum amount of sucrose needed to remodel cells for growth on  
313 disaccharides, we adapted *Z. mobilis* GH3 in RMC supplemented with 0.2 – 0.8% sucrose and  
314 compared growth in RMC+sucrose to unadapted cells and control pVector (**Fig 4B**). pVector  
315 control cells were only able to grow in RMC+0.8% sucrose, suggesting that 0.8% sucrose is the  
316 minimum amount of sucrose that will support growth of *Z. mobilis* in RMC medium (**Fig 4B**).  
317 After 72 hours, unadapted *Z. mobilis* GH3 grown in RMG before inoculating in RMC+sucrose  
318 showed little-to-no growth on RMC+0.2% sucrose and only modest growth on RMC+0.4%  
319 sucrose, the latter possibly supported by some cellobiose consumption (**S6 Fig**). Like pVector  
320 control cells, unadapted pGH3 cells grew in RMC+0.8% sucrose. However, we note that sucrose  
321 was significantly depleted from the medium by 48 hours compared to 72 hours for pVector  
322 control cells (**S6 Fig**). Continued growth of unadapted *Z. mobilis* GH3 in RMC 0.8% sucrose  
323 after 48 hours correlated with moderate consumption of cellobiose (**S6 Fig**). Sucrose-adapted *Z.*  
324 *mobilis* GH3, here defined as cells grown in RMS for 48 hours, were also inoculated into fresh  
325 RMC with increasing amounts of sucrose (*i.e.*, RMC+0.2-0.8% sucrose). In each culture, the  
326 sucrose-adapted cells consumed almost all sucrose in the medium by 24 hours and after which  
327 cells continued to grow on cellobiose (**Fig 4B and S5C Fig**). These results suggest that 0.2%

328 sucrose is sufficient to remodel *Z. mobilis* GH3 for growth on cellobiose, but that adaptation in  
329 higher sucrose concentrations will support more cell growth and greater rates of cellobiose  
330 consumption.

331

### 332 *Adaptation in cellobiose or sucrose medium remodeled Z. mobilis similarly*

333 Adaptation to both cellobiose and sucrose similarly promote growth on cellobiose and induce  
334 increases in extracellular and whole cell GH activity. However, it is unclear what specific  
335 cellular changes occur in response to sucrose and cellobiose adaptation and what changes are  
336 needed for growth on cellobiose. To address this question, we compared protein levels of *Z.*  
337 *mobilis* GH3 adapted in cellobiose and sucrose and compared to unadapted cells grown in  
338 glucose (see **Methods**) using unlabeled mass spectrometry proteomics. Both extracellular and  
339 intracellular protein fractions were collected and analyzed. A total of 1539 proteins were  
340 identified from intracellular samples, representing >80% of annotated protein-coding genes in *Z.*  
341 *mobilis* ZM4 ATCC 31821 (5). A total of 1231 proteins were identified from extracellular  
342 samples, but most extracellular proteins (1215 out of 1231) overlapped with the intracellular  
343 fraction of proteins. This result suggests that many proteins detected in the growth medium (*i.e.*,  
344 the extracellular fraction) are likely derived from the cytoplasm either by cell breakage or by  
345 incomplete separation of cells from the extracellular medium.

346 We observed greater similarity in intracellular protein levels ( $R^2 = 0.37$ ) between cellobiose-  
347 and sucrose-adapted cells when normalized to glucose-grown cells whereas extracellular protein  
348 levels were less similar across conditions ( $R^2 = 0.17$ ) (**S7 Fig**). Given our observations that  
349 extracellular GH activity increases during adaptation to cellobiose and that sucrase and  
350 levansucrase are known to be secreted from *Z. mobilis* (23) in response to sucrose, we looked at



351 levels of secretion-related proteins in both sucrose- and cellobiose-adapted cells. Notably, the  
352 levels of a majority of annotated transport and secretion-related proteins increased in both  
353 sucrose- and cellobiose-adapted cells (**Fig 5, S7 Fig**). Interestingly, GH3 CC\_0968 was also  
354 upregulated in both extracellular and intracellular fractions in both cellobiose and sucrose media  
355 (**Fig 5, S8 Fig**) despite a consistent amount of IPTG in the glucose, sucrose, and cellobiose  
356 media. This increase in GH3 expression may be explained by an increase in pGH3 plasmid copy  
357 number, reduced turnover of GH3 after secretion to the extracellular medium, or both.

358  
359 **Figure 5.** Volcano plots of Gene Ontology (GO) enrichment analysis showing differential  
360 expression of GO term proteins. The upper panels show (A) intracellular and (B) extracellular  
361 proteomics for cellobiose-adapted *Z. mobilis* GH3 compared to unadapted strain. The lower  
362 panels show (C) intracellular and (D) extracellular proteomics for sucrose-adapted *Z. mobilis*  
363 GH3 compared to unadapted strain. All enriched GO term proteins are indicated with spheres of  
364 distinct colors and  $\beta$ -glucosidase upregulation is shown in highlighted star.

365  
366 To understand the nature of protein remodeling during sucrose and cellobiose adaptation  
367 more completely, we performed K-means clustering on normalized log<sub>2</sub>-fold change values  
368 (normalized to glucose-grown cells) for proteins that were measured in both the intracellular and  
369 extracellular fractions (1199 proteins in total). In total, 50 clusters were produced revealing  
370 similar remodeling patterns between sucrose- and cellobiose-adapted cells (**Fig 6**). Two  
371 prominent clusters are present in which protein levels are similarly downregulated or upregulated  
372 in sucrose- and cellobiose-adapted cells. We performed Gene Ontology (GO) enrichment  
373 analysis of KEGG pathways (24) for each cluster and identified several pathways that were

374 statically enriched across six clusters. Of the clusters primarily comprised of upregulated  
375 proteins, several transport-related and cell membrane pathways were enriched such as the ABC  
376 transporter, integral membrane component, receptor activity, transported activity, and cell outer  
377 membrane pathways (**Figs 5 and 6**). These results are consistent with GO-term enrichment  
378 analysis of differential protein levels in each sample compared to glucose-grown cells where GO  
379 terms related to stress (oxidoreductase), secretion, and transport (periplasmic space, OM,  
380 transport, and protein secretion) were enriched in both intra- and extracellular fractions of  
381 cellobiose- and sucrose-adapted strains (**S4 Table**). Within the large cluster of primarily  
382 downregulated proteins several growth-related pathways were enriched including the ATP  
383 synthase, ribosome, translation, and purine and pyrimidine biosynthesis pathways (**Fig 6**). A  
384 decrease in growth-related proteins can be attributed to the reduced growth rate of cells  
385 metabolizing cellobiose or sucrose relative to cells growing on glucose.

386  
387 **Figure 6.** Heat map displaying hierarchical clustering of control-normalized log<sub>2</sub> fold changes of  
388 1199 molecules quantified across 12 replicates. Both row-wise and column-wise clustering was  
389 performed using Euclidean distance and average linkage calculations. 50 distinct hierarchical  
390 clusters are represented in the color bar shown alongside the heat map and only the significant  
391 protein families are indicated.

392  
393 Despite the similarities in protein expression between cellobiose- and sucrose-adapted cells,  
394 we observed sets of proteins uniquely differentially expressed between the two conditions (**S7**  
395 **Fig**). Of note, we observed a disparity in the expression patterns of SacB (extracellular  
396 levansucrase) and SacC (extracellular sucrose) (25-27). Although SacB was upregulated in both

397 cellobiose and sucrose adapted cells (**S1 Data**), SacC expression was only upregulated in  
398 sucrose-adapted cells. Previous work has shown that SacB and SacC can be expressed as both a  
399 bicistronic transcript and individually as monocistronic transcripts with SacC under control of a  
400 strong promoter (28). Our results indicate that SacC upregulation is dependent on a sucrose-  
401 specific signal whereas SacB monocistronic expression can be activated in a sucrose-  
402 independent manner.

403

## 404 **DISCUSSION**

405 Our study of xenogeneic GH-enabled growth of *Z. mobilis* on cellobiose and its conversion to  
406 ethanol revealed two key discoveries. First, even though high expression of a  $\beta$ -glucosidase from  
407 a closely related  $\alpha$ -proteobacterium *C. crescentus* occurs relatively quickly (within 12 hours) in  
408 rich medium glucose, *Z. mobilis* GH3 depends on a transient adaptation period of several days  
409 before growth on cellobiose and high-flux ethanol production becomes possible. Second,  
410 growing *Z. mobilis* on sucrose induces cellular changes similar to cellobiose adaptation that also  
411 allow *Z. mobilis* GH3 to readily grow on cellobiose without a long lag phase.

412

### 413 ***Cellobiose adaptation coincides with extensive changes to the *Z. mobilis* envelope***

414 In this study, we showed that adaptation of *Z. mobilis* GH3 to cellobiose medium correlated with  
415 extensive changes to its cell envelope which coincided with an increased presence of GH3 in the  
416 extracellular medium. When grown in RMG, GH3 was located mostly in the periplasm and  
417 cytoplasm with only a small fraction of GH3 secreted to the culture medium (**Table 1**). These  
418 initial low levels of extracellular or periplasmic GH were insufficient to generate enough glucose  
419 for growth and the strain required an approximately 72-hour lag phase before cells became

420 adapted and slow growth could commence (**Fig 2A**). Growth on cellobiose consistently  
421 coincided with increased GH activity in the extracellular or outer membrane space (**Table 1, Fig**  
422 **2, S5 Fig**) underscoring the importance of GH localization for cellobiose conversion. Once cells  
423 expressing GH3 were adapted to cellobiose, they could continue to grow without a long lag when  
424 placed in fresh cellobiose medium. However, this adaptation to cellobiose was reversible, and  
425 when cellobiose-adapted cells were regrown in RMG they would again require a long lag phase  
426 (**Fig 2B**) in cellobiose medium before growth could occur. Thus, cellobiose adaptation consisted  
427 of a reversible change to the cellular composition that was not conferred by a stable genetic  
428 adaptation.

429 Our proteomics results revealed that adaptation to cellobiose changed the protein  
430 composition of *Z. mobilis* GH3 compared to a glucose-grown control. The protein expression  
431 patterns clustered into groups of proteins of related functions in both the intracellular and  
432 extracellular fractions (**Fig 6**). Notably, proteins related to secretion and transport were  
433 upregulated (**Fig 5**) which we hypothesize lead to increased secretion of GH3, increased display  
434 of GH3 on the outer membrane or entry of substrates (cellobiose) into the periplasm, or all of the  
435 above (**Fig 2D**).

436

437 ***Cellobiose and sucrose adaptation may be comprised of a native scavenging response to***  
438 ***glucose depletion***

439 Similar cellular changes were observed during adaptation on cellobiose and adaptation to  
440 sucrose, a native disaccharide substrate in *Z. mobilis*. This similarity is apparent in the protein  
441 level changes in cellobiose- and sucrose-adapted cells, including increased extracellular GH3,  
442 and by the observation that adaptation to sucrose enables growth on cellobiose. Although sucrose

443 is a natural substrate for *Z. mobilis*, we also observed a long lag phase before cells began  
444 growing on sucrose. Given these findings, we hypothesize that the changes in cellular envelope  
445 and protein secretion that accompany both sucrose and cellobiose adaptation are part of a  
446 generalized scavenging response to glucose-depleted conditions. The changes in protein  
447 secretion and envelope composition during this scavenging response could improve acquisition  
448 of nutrients by *Z. mobilis* from the extracellular medium. Should a suitable substrate be found  
449 while scavenging, then substrate-specific and possibly more energy intensive responses would be  
450 activated as we observed with sucrose-specific upregulation of SacC. In the case of cellobiose  
451 adaptation this cellular remodeling increased GH3 secretion or surface display of cells incubated  
452 with cellobiose and ultimately enabled cells to grow on cellobiose.

453

#### 454 ***Prospects for engineering Z. mobilis for broader utilization of oligosaccharides***

455 *Z. mobilis* is being developed as a platform for the conversion of lignocellulosic hydrolysates to  
456 biofuels and bioproducts. Complete utilization of oligosaccharides will improve product yields  
457 and economic feasibility of lignocellulosic biomass conversion. Our findings highlight important  
458 challenges to engineering broader oligosaccharide utilization in *Z. mobilis*. First and foremost,  
459 we lack a comprehensive understanding of native secretion and transport pathways in *Z. mobilis*.  
460 Broadening the substrate specificity to oligosaccharides beyond cellobiose will require a more  
461 complete understanding of the rules governing both GH secretion and oligosaccharide entry to  
462 the periplasm in *Z. mobilis*. It is clear from our work and the work of others (29, 30) that GH  
463 localization and substrate accessibility is crucially important. Likewise, the impact of species  
464 origin on heterologous gene expression in *Z. mobilis* may not be fully appreciated. That  
465 expression of *celA* from *C. japonicus* did not enable *Z. mobilis* to grow on cellobiose, even when

466 allowing time for adaptation, suggests that important differences exist in how xenogeneic  
467 glycosyl hydrolases are recognized by and interact with endogenous *Z. mobilis* pathways.

468         Although GH3 expression allows *Z. mobilis* to metabolize cellobiose, the long adaptation  
469 time required to remodel *Z. mobilis* for growth on cellobiose is not practical for industrial  
470 applications. Continuous fermentations may be a suitable option given that cellobiose adaptation  
471 is retained upon transfer to fresh RMC. However, this option does not eliminate the initial long  
472 adaptation time. Further mechanistic dissection of cellobiose and sucrose adaptation is needed to  
473 identify key regulators governing adaptation (e.g., the proposed scavenging response). With  
474 greater understanding of the basic mechanisms, it is plausible that GH-expressing strains could  
475 be engineered by rewiring the natural response to sucrose to induce the necessary cellular  
476 changes to support oligosaccharide metabolism and eliminate the need for a long adaptation to  
477 achieve cellular remodeling.

478

## 479 **MATERIALS AND METHODS**

### 480 **Strains, plasmids and culture conditions**

481 *Zymomonas mobilis* ZM4 (ATCC #31821), *Escherichia coli* DH10B (Invitrogen, Carlsbad, CA,  
482 USA) and *E. coli* DH5 $\alpha$  (New England BioLabs, Ipswich, MA, USA) were used in this study.  
483 The *E. coli* DH10B strain was used for cloning and *E. coli* DH5 $\alpha$  was used for expressing the  
484 recombinant plasmids. Unless otherwise specified, all the *E. coli* strains were grown in LB or  
485 MOPS minimal medium (17) at 37°C with shaking. *Z. mobilis* strains were grown in rich  
486 medium containing 1% yeast extract, 15 mM KH<sub>2</sub>PO<sub>4</sub> plus 2% glucose (RMG), 2% cellobiose  
487 (RMC), varying concentrations of sucrose (RMS), or in *Zymomonas* minimal medium (ZMM)  
488 (18) at 30°C without shaking. Plasmid pIND4-spec, a derivative of the *Rhodobacter*-derived,  
489 broad-host-range shuttle vector pIND4 (31) in which the kanamycin-resistance gene was  
490 replaced with a spectinomycin resistance gene, was used to clone and express glycoside  
491 hydrolases. Spectinomycin concentration at 50  $\mu$ g ml<sup>-1</sup> for *E. coli* and 100  $\mu$ g ml<sup>-1</sup> for *Z. mobilis*  
492 were used.

493

### 494 **Plasmid construction**

495 All oligonucleotide primers used for cloning are listed in **S1 Table** and were obtained from  
496 Integrated DNA Technologies (Coralville, IA, USA). For plasmid construction, the vector  
497 backbone and gene fragments were amplified by PCR using Q5 DNA polymerase (New England  
498 Biolabs, Ipswich, MA, USA) following the manufacturer's protocol. DNA fragments were  
499 purified by agarose gel electrophoresis and assembled using Gibson Assembly mix (New  
500 England Biolabs, Ipswich, MA, USA) following the manufacturer's protocol. All plasmids used

501 in this study were verified by DNA sequencing and restriction enzyme digestion analysis and are  
502 listed in **S2 Table**.

503 The plasmids pCel3A and pGH3 were constructed by cloning the respective glycosyl  
504 hydrolases encoded by *cel3A* from *Cellvibrio japonicus* and *CC\_0968* from *Caulobacter*  
505 *crenscentus* in pIND4-spec (pVector). The predicted localizations of Cel3A and CC\_0968 are  
506 shown in **S3 Table**.

507

## 508 **Transformations of *E. coli* and *Z. mobilis* cells**

509 Electro-competent cells were prepared following standard protocol (32). About 100 ng of  
510 plasmid DNA or Gibson assembly mixture was used to transform  $\sim 10^9$  cells in 50  $\mu$ l of *E. coli*  
511 competent cells in 10% glycerol. Electroporation of *E. coli* was performed with a Bio-Rad gene  
512 pulser with a setting of 200 $\Omega$ , 25  $\mu$ F, and 1.75 kV in a 0.1 cm cuvette. Immediately after  
513 electroporation, 1 ml SOC medium was added and cells were incubated at 37°C for 1 hour; 100  
514  $\mu$ l of the recovered cells were then spread on LB agar containing appropriate antibiotic for  
515 selection and the plates were incubated at 37°C overnight.

516 For *Z. mobilis* transformation,  $\sim 1$   $\mu$ g plasmid DNA was used to transform  $\sim 10^9$  cells in 50  $\mu$ l  
517 in 10% glycerol. Type 1 restriction inhibitor (1  $\mu$ l; Epicentre) was added to the plasmid DNA  
518 prior to mixing with competent cells. Electroporation of *Z. mobilis* was performed with a Bio-  
519 Rad gene pulser with a setting of 200 $\Omega$ , 25  $\mu$ F, and 1.6 kV in a 0.1 cm cuvette. Immediately after  
520 electroporation, 1 ml recovery broth (5 g glucose/L, 10 g yeast extract/L, 5 g tryptone/L, 2.5 g  
521 (NH<sub>4</sub>)<sub>2</sub>SO<sub>4</sub>/L, 0.2 g KH<sub>2</sub>PO<sub>4</sub>/L, and 0.25 g MgSO<sub>4</sub>•7H<sub>2</sub>O/L) was added and the cells were  
522 incubated for 2-3 hours at 30°C. The recovered cells were spread on RMG-agar containing the



523 appropriate antibiotic for selection and the plates were incubated at 30°C for 2-4 days to obtain  
524 transformed colonies.

525

## 526 **Extraction of cellular and subcellular fractions, protein** 527 **quantification, and activity assay**

528 For activity measurements, seed cultures were prepared by overnight cultivation in the desired  
529 conditions. Five ml of LB or RMG supplemented with required concentration of spectinomycin  
530 were inoculated with seed cultures of *E. coli* and *Z. mobilis*, respectively, and incubated until the  
531 apparent OD<sub>600</sub> reached ~0.4. For protein induction, 0.2 mM IPTG was added to both cultures  
532 and incubation was continued overnight. Extracellular and intracellular fractions (supernatant,  
533 periplasm, cytoplasm, spheroplast and whole cells) were prepared from the same number of cells  
534 quantified by measuring apparent OD<sub>600</sub> and adjusting the volume to obtain an apparent OD<sub>600</sub> of  
535 1.5.

536 The supernatant fraction (supernatant/culture medium) was obtained by centrifugation of the  
537 cell culture at 20,000 x g for 3 minutes at 4°C. Spheroplasts were prepared by the osmotic shock  
538 protocol (20). Briefly, after removing the culture medium as supernatant, the pellets were  
539 resuspended in 500 µl of 20 mM Tris-Cl pH 8.0, 2.5 mM EDTA, 20% (w/v) sucrose and  
540 incubated on ice for 10 minutes. The sample was then centrifuged for 3 minutes at 20,000 x g at  
541 4°C and supernatant was discarded. The pellets were resuspended in 300 µl of sterile ice-cold  
542 water and incubated in ice for 10 minutes. After centrifugation at 20,000 x g for 3 minutes at  
543 4°C, the supernatant was collected as periplasmic fraction (periplasm) and the remaining pellets  
544 (spheroplasts) were resuspended in 300 µl sterile ice-cold water. For preparation of cytoplasmic

545 fraction, spheroplasts were treated with 50  $\mu$ l Popculture (Novagen, Madison, WI, USA), 50  $\mu$ l  
546 lysozyme solution (10 mg/ml) and 200  $\mu$ l sterile water and incubated at 30°C for 30 minutes.  
547 After centrifugation, the supernatant was collected as cytoplasmic fraction (cytoplasm). Whole  
548 cells were prepared by removing culture medium by centrifugation and resuspension in 300  $\mu$ l  
549 sterile water.

550 Protein concentration was measured by using Bicinchoninic Acid (BCA) assay (Thermo  
551 Scientific) following the manufacturer's protocol. Twenty microliter cell samples and standards  
552 of diluted bovine serum albumin (BSA) were transferred to clean 1.5 ml microtubes. A no  
553 protein control was also included. Cold (-20°C) acetone (80  $\mu$ l) was added and the sample was  
554 vortexed vigorously and incubated at -20°C for 1 hour. The proteins were pelleted by  
555 centrifugation at 4°C at 15,000 x g for 15 minutes. The supernatant was then carefully removed  
556 and discarded. Protein pellets were washed with 100  $\mu$ l of cold 100% acetone by adding it  
557 around the walls and spinning at 4°C 15,000 x g for 2 minutes. After removal of supernatant, the  
558 pellets were dried *in vacuo* at room temperature for 10 minutes. The dried pellets were  
559 resuspended in 20  $\mu$ l of 2% SDS, 9 mM Tris-Cl pH 8.0 and incubated at 70°C for 10 minutes.  
560 Protein concentration was measured following the manufacturer's protocol. Samples were  
561 incubated at 37°C for 30 minutes to 2 hours. Absorbance was measured at 562 nm in a Tecan  
562 M1000 plate reader (Tecan Group Ltd., Männedorf, Switzerland) and protein concentration was  
563 determined by comparison to BSA standards.

564 The glycosyl hydrolase activity assay was performed by adding 20 or 25  $\mu$ l of protein  
565 sample to 50  $\mu$ l of 2 mM 4-methylumbelliferyl  $\beta$ -D-glucopyranoside (MUG; Sigma-Aldrich, St.  
566 Louis, MO, USA) in a 96-well plate. The reaction was monitored in a Tecan M1000 plate reader  
567 with fluorescence excitation at 365 nm and emission at 455 nm for 180 minutes with readings

568 every 5 minutes. The fluorescence produced was plotted as a function of time and the enzyme  
569 activity was determined from the slope of this plot. The activity value was normalized by the  
570 amount of protein present in the reaction.

571

## 572 **Growth adaptation**

573 Triplicate samples of *Z. mobilis* GH3 (expressing *CC\_0968*) and the pVector control were grown  
574 overnight in 5 ml RMG medium containing spectinomycin at 30°C. One ml of each sample at  
575 apparent OD<sub>600</sub> ~1.0 was centrifuged and washed twice with sterile RMC medium. Washed cell  
576 pellets were then resuspended in a culture tube with 10 ml RMC medium containing  
577 spectinomycin and 0.4 mM IPTG. Culture tubes were then incubated at 30°C without shaking.  
578 Growth was monitored initially after 3, 6, 12 and 24 hours, and then every 24 hours. After a  
579 significant growth was seen for *Z. mobilis* GH3, cells were collected, washed with RMC  
580 medium, and resuspended again in RMC with spectinomycin and IPTG. This process was  
581 repeated with RMC medium supplemented with 0.05% glucose (RMCG) and the data are  
582 presented in this study (**Fig 2A**). To evaluate whether the adaptation was due to permanent  
583 genetic change, cellobiose-adapted *Z. mobilis* GH3 was regrown in RMG medium (reRMG) and  
584 transferred back to fresh RMCG medium after washing. Growth of three types of *Z. mobilis* GH3  
585 strains, unadapted, adapted and adapted regrown in RMG (reRMG), were then compared in  
586 identical conditions (**Fig 2B**).

587 A serial passage experiment also was performed using *Z. mobilis* GH3 and pVector (**Fig 3**).  
588 The cells were grown in RMG overnight, collected by centrifugation and washed with RMC to  
589 remove residual glucose. The cells were then resuspended in RMC containing spectinomycin and  
590 0.4 mM IPTG to an apparent OD<sub>600</sub> of ~0.1 and incubated at 30°C for 3 days (first passage).

591 After 3 days, apparent OD<sub>600</sub> was measured and the second passage was performed after  
592 centrifugation and resuspension of the cell pellets in fresh RMC-spectinomycin-PTG medium at  
593 a similar starting apparent OD<sub>600</sub>. Incubation was continued for 2 days and then the third passage  
594 was performed after similar recovery by centrifugation and resuspension of the cell pellets in  
595 fresh RMC-spectinomycin-IPTG medium. For the third passage, incubation was continued for  
596 one day. Cultures were then quantified for apparent OD<sub>600</sub> and stored for metabolite analysis by  
597 HPLC.

598 For adaptation in sucrose medium, *Z. mobilis* GH3 was grown in rich medium containing  
599 2% sucrose (RMS) at 30°C for 48 hours without shaking. After 48h, cells were collected by  
600 centrifugation at 5000 x g for 5 minutes at room temperature. Supernatant was discarded and  
601 pellets were washed with sterile deionized water. Finally, the pellets were resuspended in a  
602 medium where the subsequent culture was to be done.

603

#### 604 ***Growth and activity measurement from adapted vs unadapted culture***

605 Adapted cultures were derived from cells grown in RMCG for 24 hours. Unadapted cultures  
606 were derived from cells grown in RMG for 12 hours. After centrifugation, the pellets were  
607 washed with RMC and resuspended in RMCG medium containing spectinomycin and IPTG. For  
608 growth measurement, samples were removed at time intervals, apparent OD<sub>600</sub> was recorded and  
609 cells were stored at -20°C prior to metabolite analysis. For GH activity measurements, the  
610 required volume of cells was withdrawn from the culture tube, centrifuged at 20,000 x g for 5  
611 minutes. The supernatant was transferred to a fresh tube to assay for extracellular GH activity  
612 and the pellets were washed with water and resuspended in water at a calculated volume to give  
613 an equivalent number of cells in all samples. For GH activity measurement, 20 or 25 µl of

614 extracellular or pellet fractions were transferred to a 96-well plate in triplicate, 50  $\mu$ l of 2 mM  
615 MUG was added, and the readings in a Tecan 1000 plate reader were immediately started  
616 (fluorescence excitation at 365 nm and emission of 455 nm and, for cell samples, cell density at  
617 600 nm). Normalization was performed by dividing the fluorescence value with corresponding  
618 apparent OD<sub>600</sub>.  
619

## 620 **SDS PAGE and GH3 protein signal measurement**

621 For analysis of GH3 protein induction, both adapted and unadapted *Z. mobilis* strains with  
622 plasmids pGH3 or pGH3T were grown in replicate in RMG supplemented with appropriate  
623 concentration of antibiotics (**S3 Fig**). The plasmid pGH3T encodes, in addition to GH3, a *C.*  
624 *crescentus* TonB receptor for cellobiose (*CC\_0970*) that was found to have little or no effect on  
625 cellobiose utilization in *Z. mobilis*. To one replicate, IPTG was added to a final concentration of  
626 0.5 mM when the culture reached apparent OD<sub>600</sub> of ~0.4 and growth was continued for 24  
627 hours. Final apparent OD<sub>600</sub> was measured for all samples. Approximately equal numbers of  
628 cells equivalent to one ml of apparent OD<sub>600</sub> ~3.0 were centrifuged at 10,000 x g for 5 minutes.  
629 The pellets were resuspended in 20 µl of 1x SDS loading solution (62 mM Tris·Cl, pH6.8, 2%  
630 w/v SDS, 10% v/v glycerol, 5% v/v β-mercaptoethanol, 0.05% w/v bromphenol blue),  
631 incubated at 98°C for 10 minutes, and then immediately cooled on ice for 5 minutes. The  
632 samples were centrifuged at 10,000 x g for 2 minutes and 10 µl portions of the supernatants  
633 were loaded on a 4-12% Tris-Glycine slab gel connected to Tris-Glycine SDS running buffer  
634 (Invitrogen). The gel was electrophoresed at 200 volts for 1 hour, stained with Coomassie  
635 Brilliant Blue R-250 solution (BioRad, #1610436), imaged using a white light transilluminator  
636 and a CCD camera equipped with an 595 ± 55 nm bandpass filter (Fluorichem 8000; Protein  
637 Simple, Inc.), and then quantified using Imagequant software (GE Healthcare).

638

## 639 **Quantification of cellobiose conversion and ethanol production**

640 Samples were withdrawn after apparent OD<sub>600</sub> measurement and stored at -20°C until all  
641 required time points were collected. The frozen samples were thawed at room temperature and  
642 vortexed and centrifuged prior to subsampling. 100 µl of the samples were transferred to labeled

643 1.5 ml autosampler vials and 900  $\mu$ l of pure water was added to each vial and mixed properly.  
644 The vials were capped and placed in a 4°C cooled autosampler tray. Fifty  $\mu$ L were injected to an  
645 Agilent 1260 Infinity HPLC system with a quaternary pump, vacuum degasser, and refractive  
646 index detector (Agilent Technologies, Inc., Palo Alto, CA) and separated on an Aminex HPX-  
647 87H with Cation-H guard column (BioRad, Inc., Hercules, CA, USA) 300x7.8mm, cat #125-  
648 0140. The mobile phase was 0.02 N H<sub>2</sub>SO<sub>4</sub> was used at a flow rate of 0.5 ml/min, and both  
649 column and detector temperatures were maintained at 50°C. Data were analyzed using  
650 ChemStation C.01.06 software (Agilent Technologies, Inc., Palo Alto, CA, USA). The  
651 metabolites of interest (cellobiose, glucose, and ethanol) were analyzed and quantified using  
652 standard calibration curve prepared from the respective pure compounds obtained from Sigma-  
653 Aldrich (St. Louis, MO, USA).

654

## 655 **Proteomics analysis of cellobiose- and sucrose-adapted vs unadapted**

### 656 ***Z. mobilis* GH3**

657 *Z. mobilis* GH3 was grown in RMG, RMC, or rich medium + 2% sucrose (RMS) until the  
658 apparent OD<sub>600</sub> reached to late log phase. Cells were harvested and extracellular and intracellular  
659 fractions were collected by centrifugation at 20,000 x g for 5 minutes at 4°C. Proteins were  
660 digested, analyzed by LC-MS/MS, and peptide identity was verified with *Z. mobilis* genome  
661 peptide library as described below.

662

### 663 **Lysis and digestion**

664 Cells were lysed by suspension in 6 M guanidine hydrochloride (GnHCl), followed by addition  
665 of methanol to 90%. Samples were centrifuged at 15,000 x g for 5 minutes at 4°C. Supernatants

666 were discarded and pellets were allowed to air dry for ~5 minutes. Pellets were resuspended in  
667 200  $\mu$ L 8 M urea, 100 mM Tris pH 8.0, 10 mM (tris(2-carboxyethyl)phosphine) (TCEP), and 40  
668 mM chloroacetamide, then diluted to 2 M urea in 50 mM Tris pH 8. Trypsin was added at an  
669 estimated 50:1 ratio, and samples were incubated overnight at ambient temperature. Each sample  
670 was desalted over a PS-DVB solid phase extraction cartridge and dried *in vacuo*. Peptide mass  
671 was assayed with a peptide colorimetric assay.

672

### 673 **Liquid chromatography with tandem mass spectrometry (LC-MS/MS)**

674 For each analysis, 2  $\mu$ g of peptides were loaded onto a 75  $\mu$ m inner diameter, 30 cm long  
675 capillary with an imbedded electrospray emitter and packed with 1.7  $\mu$ m C18 BEH stationary  
676 phase. The mobile phases used were A: 0.2% formic acid and B: 0.2% formic acid in 70%  
677 acetonitrile. Peptides were eluted with an increasing gradient of acetonitrile from 0% to 53% B  
678 over 75 minutes followed by a 5 minute 100% B wash and a 10 minute equilibration in 0% B.

679 Eluting peptides were analyzed with an Orbitrap Fusion Lumos (Thermo Fisher Scientific,  
680 Waltham, MA, USA). Survey scans were performed at R = 240,000 with wide isolation analysis  
681 of 300–1,350 m/z. Data dependent top speed (1 second) MS/MS sampling of peptide precursors  
682 was enabled with dynamic exclusion set to 20 seconds on precursors with charge states 2 to 4.  
683 MS/MS sampling was performed with 1.6 Da quadrupole isolation, fragmentation by HCD with  
684 NCE of 25, analysis in the ion trap with maximum injection time of 10 milliseconds, and AGC  
685 target set to  $3 \times 10^4$ .

686

### 687 **Analysis**



688 Raw files were analyzed using MaxQuant 1.6.0.1 (33, 34). Spectra were searched using the  
689 Andromeda search engine against a *Z. mobilis subsp. mobilis* ZM4 (GEO accessions CP023715,  
690 CP023716, CP023717, CP023718, CP023719) protein database and a target decoy database  
691 generated in house. Label free quantitation (LFQ) (35) and match between runs were toggled on,  
692 and ion trap tolerance was set to 0.4 Da. All other parameters were set by default. Peptides were  
693 grouped into subsumable protein groups and filtered to 1% FDR, based on target decoy  
694 approach. Downstream analysis of protein group LFQ values were performed using the Perseus  
695 software platform (36). First, all LFQ values were log<sub>2</sub> transformed and any protein groups  
696 missing a value from  $\geq 6$  samples were removed followed by missing value imputation. Fold  
697 changes for each protein were calculated for the cellobiose and sucrose conditions by  
698 comparison of the LFQ against that of the control sample from the appropriate condition (intra-  
699 or extracellular). A Student's two sample t-test was performed for each fold change measurement  
700 and p-values were corrected for multiple hypothesis testing by the Benjamini-Hochberg method  
701 to generate quantitative FDR values.

702 K-means clustering was performed on glucose normalized log<sub>2</sub>-fold change values for  
703 proteins that were measured in both the intracellular and extracellular fraction experiments (1199  
704 proteins). The desired number of clusters was set to 50 using Euclidian distance and average  
705 linkage. Gene ontology enrichment in each cluster was performed using Fishers exact test with  
706 Benjamini-Hochberg correction for multiple hypotheses ( $p < 0.05$ ). Gene ontology annotations  
707 were downloaded from UniProt (37).

708

## 709 REFERENCES

- 710 1. He MX, Wu B, Qin H, Ruan ZY, Tan FR, Wang JL, et al. *Zymomonas mobilis*: a novel  
711 platform for future biorefineries. *Biotechnol Biofuels*. 2014;7:101.
- 712 2. Wang X, He Q, Yang Y, Wang J, Haning K, Hu Y, et al. Advances and prospects in  
713 metabolic engineering of *Zymomonas mobilis*. *Metab Eng*. 2018;50:57-73.
- 714 3. Yang S, Fei Q, Zhang Y, Contreras LM, Utturkar SM, Brown SD, et al. *Zymomonas mobilis*  
715 as a model system for production of biofuels and biochemicals. *Microb Biotechnol*.  
716 2016;9(6):699-717.
- 717 4. Menon V, Rao M. Trends in bioconversion of lignocellulose: Biofuels, platform chemicals &  
718 biorefinery concept. *Prog Energy Combust Sci*. 2012;38(4):522-50.
- 719 5. Yang S, Vera JM, Grass J, Savvakis G, Moskvina OV, Yang Y, et al. Complete genome  
720 sequence and the expression pattern of plasmids of the model ethanologen *Zymomonas*  
721 *mobilis* ZM4 and its xylose-utilizing derivatives 8b and 2032. *Biotechnol Biofuels*.  
722 2018;11:125.
- 723 6. Flamholz A, Noor E, Bar-Even A, Liebermeister W, Milo R. Glycolytic strategy as a tradeoff  
724 between energy yield and protein cost. *Proc Natl Acad Sci U S A*. 2013;110(24):10039-44.
- 725 7. Zhang M, Eddy C, Deanda K, Finkelstein M, Picataggio S. Metabolic engineering of a  
726 pentose metabolism pathway in ethanologenic *Zymomonas mobilis*. *Science*.  
727 1995;267(5195):240-3.

- 728 8. Deanda K, Zhang M, Eddy C, Picataggio S. Development of an arabinose-fermenting  
729 *Zymomonas mobilis* strain by metabolic pathway engineering. *Appl Environ Microbiol.*  
730 1996;62(12):4465-70.
- 731 9. Yanase H, Nozaki K, Okamoto K. Ethanol production from cellulosic materials by  
732 genetically engineered *Zymomonas mobilis*. *Biotechnol Lett.* 2005;27(4):259-63.
- 733 10. Xue S, Uppugundla N, Bowman MJ, Cavalier D, Da Costa Sousa L, B ED, et al. Sugar loss  
734 and enzyme inhibition due to oligosaccharide accumulation during high solids-loading  
735 enzymatic hydrolysis. *Biotechnol Biofuels.* 2015;8:195.
- 736 11. Luterbacher JS, Rand JM, Alonso DM, Han J, Youngquist JT, Maravelias CT, et al.  
737 Nonenzymatic sugar production from biomass using biomass-derived gamma-  
738 valerolactone. *Science.* 2014;343(6168):277-80.
- 739 12. Bokinsky G, Peralta-Yahya PP, George A, Holmes BM, Steen EJ, Dietrich J, et al. Synthesis  
740 of three advanced biofuels from ionic liquid-pretreated switchgrass using engineered  
741 *Escherichia coli*. *Proc Natl Acad Sci U S A.* 2011;108(50):19949-54.
- 742 13. Brestic-Goachet N, Gunasekaran P, Cami B, Baratti JC. Transfer and expression of an  
743 *Erwinia chrysanthemi* cellulase gene in *Zymomonas mobilis*. *J Gen Microbiol.*  
744 1989;135:893-902.
- 745 14. Lejeune A, Eveleigh DE, Colson C. Expression of an endoglucanase gene of *Pseudomonas*  
746 *fluorescens* var. *cellulosa* in *Zymomonas mobilis*. *FEMS Microbiol Lett.* 1988;49:363-6.

- 747 15. Misawa N, Okamoto T, Nakamura K. Expression of a cellulase gene in *Zymomonas mobilis*.  
748 J Biotechnol. 1988;7:167-78.
- 749 16. Linger JG, Adney WS, Darzins A. Heterologous expression and extracellular secretion of  
750 cellulolytic enzymes by *Zymomonas mobilis*. Appl Environ Microbiol. 2010;76(19):6360-  
751 9.
- 752 17. Neidhardt FC, Bloch PL, Smith DF. Culture medium for enterobacteria. J Bacteriol.  
753 1974;119(3):736-47.
- 754 18. Goodman AE, Rogers PL, Skotnicki ML. Minimal medium for isolation of auxotrophic  
755 *Zymomonas* mutants. Appl Environ Microbiol. 1982;44(2):496-8.
- 756 19. Rudner DZ, Losick R. Protein subcellular localization in bacteria. Cold Spring Harb Perspect  
757 Biol. 2010;2:a000307.
- 758 20. Neu HC, Heppel LA. The release of enzymes from *Escherichia coli* by osmotic shock and  
759 during the formation of spheroplasts. J Biol Chem. 1965;240(9):3685-92.
- 760 21. Juncker AS, Willenbrock H, Von Heijne G, Brunak S, Nielsen H, Krogh A. Prediction of  
761 lipoprotein signal peptides in Gram-negative bacteria. Protein Sci. 2003;12(8):1652-62.
- 762 22. Gardy JL, Spencer C, Wang K, Ester M, Tusnady GE, Simon I, et al. PSORT-B: Improving  
763 protein subcellular localization prediction for Gram-negative bacteria. Nucleic Acids Res.  
764 2003;31(13):3613-7.
- 765 23. Preziosi L, Michel GPF, Baratti J. Sucrose metabolism in *Zymomonas mobilis*: production  
766 and localization of sucrose and levansucrose activities. Can J Microbiol. 1990;36:159-63.

- 767 24. Young MD, Wakefield MJ, Smyth GK, Oshlack A. Gene ontology analysis for RNA-seq:  
768 accounting for selection bias. *Genome Biol.* 2010;11(2):R14.
- 769 25. Gunasekaran P, Mukundan G, Kannan R, Velmurugan S, Aït-Abdelkader N, Alvarez-  
770 Macarie E, et al. The *sacB* and *sacC* genes encoding levansucrase and sucrase form a gene  
771 cluster in *Zymomonas mobilis*. *Biotechnol Lett.* 1995;17(6):635-42.
- 772 26. Kannan R, Mukundan G, Ait-Abdelkader N, Augier-Magro V, Baratti J, Gunasekaran P.  
773 Molecular cloning and characterization of the extracellular sucrase gene (*sacC*) of  
774 *Zymomonas mobilis*. *Arch Microbiol.* 1995;163(3):195-204.
- 775 27. Senthilkumar V, Rajendhran J, Busby SJ, Gunasekaran P. Characterization of multiple  
776 promoters and transcript stability in the *sacB-sacC* gene cluster in *Zymomonas mobilis*.  
777 *Arch Microbiol.* 2009;191(6):529-41.
- 778 28. Senthilkumar V, Rameshkumar N, Busby SJ, Gunasekaran P. Disruption of the *Zymomonas*  
779 *mobilis* extracellular sucrase gene (*sacC*) improves levan production. *J Appl Microbiol.*  
780 2004;96(4):671-6.
- 781 29. Wu B, He MX, Feng H, Shui ZX, Tang XY, Hu QC, et al. Construction of a novel secretion  
782 expression system guided by native signal peptide of PhoD in *Zymomonas mobilis*. *Biosci*  
783 *Biotechnol Biochem.* 2014;78(4):708-13.
- 784 30. Luo Z, Bao J. Secretive expression of heterologous  $\beta$ -glucosidase in *Zymomonas mobilis*.  
785 *Bioresources Bioprocess.* 2015;2:29.

- 786 31. Ind AC, Porter SL, Brown MT, Byles ED, de Beyer JA, Godfrey SA, et al. Inducible-  
787 expression plasmid for *Rhodobacter sphaeroides* and *Paracoccus denitrificans*. *Appl*  
788 *Environ Microbiol.* 2009;75(20):6613-5.
- 789 32. Jeon YJ, Svenson CJ, Rogers PL. Over-expression of xylulokinase in a xylose-metabolising  
790 recombinant strain of *Zymomonas mobilis*. *FEMS Microbiol Lett.* 2005;244(1):85-92.
- 791 33. Tyanova S, Temu T, Cox J. The MaxQuant computational platform for mass spectrometry-  
792 based shotgun proteomics. *Nat Protoc.* 2016;11(12):2301-19.
- 793 34. Cox J, Mann M. MaxQuant enables high peptide identification rates, individualized p.p.b.-  
794 range mass accuracies and proteome-wide protein quantification. *Nat Biotechnol.*  
795 2008;26(12):1367-72.
- 796 35. Cox J, Hein MY, Luber CA, Paron I, Nagaraj N, Mann M. Accurate proteome-wide label-  
797 free quantification by delayed normalization and maximal peptide ratio extraction, termed  
798 MaxLFQ. *Mol Cell Proteomics.* 2014;13(9):2513-26.
- 799 36. Tyanova S, Temu T, Sinitcyn P, Carlson A, Hein MY, Geiger T, et al. The Perseus  
800 computational platform for comprehensive analysis of (prote)omics data. *Nat Methods.*  
801 2016;13(9):731-40.
- 802 37. The UniProt Consortium. UniProt: a worldwide hub of protein knowledge. *Nucleic Acids*  
803 *Res.* 2019;47(D1):D506-D15.  
804

## 805 **SUPPORTING INFORMATION CAPTIONS**

806 **S1 Table. Primers used in this study.**

807

808 **S2 Table. Plasmids and strains used in this study.**

809

810 **S3 Table. Localization prediction of glycosyl hydrolase used in this study.**

811

812 **S4 Table. Enriched gene ontology (GO) terms in both upregulated and downregulated**  
813 **intracellular and extracellular fractions of cellobiose- and sucrose-adapted *Z. mobilis***  
814 **ZM4+pGH3 strain relative to glucose grown cells.**

815

816 **S1 Figure. Growth of *Z. mobilis* with GH3 and pVector control in rich medium glucose**  
817 **(RMG) supplemented with required antibiotics and IPTG.**

818

819 **S2 Figure. Growth of *Z. mobilis* GH3 on cellobiose requires IPTG.** The left plate (A) is RMC  
820 with 100 µg spectinomycin/ml and no IPTG. The right plate (B) is RMC with 100 µg  
821 spectinomycin/ml and 0.4 mM IPTG.

822

823 **S3 Figure. Heterologous protein production measurement.** (A) SDS-PAGE showing total  
824 crude proteins. (B) Highlighted showing GH3 produced in the sample with IPTG induction. (C)  
825 GH3 signal measured as percent of total signal in each lane.

826

827 **S4 Figure. Cellobiose conversion and ethanol production by *Z. mobilis* GH3 or pVector**  
828 **control in RMCG medium.** (A) Cellobiose conversion by *Z. mobilis* ZM4 strains containing  
829 pVector or pGH3 plasmids in RMCG medium. Cellobiose conversion was observed after 96  
830 hours only in the strain expressing glycosyl hydrolase (pGH3) but not in the control with  
831 pVector. (B) Ethanol production was observed after 96 hours only in the strain expressing  
832 glycosyl hydrolase (pGH3) but not in the control with pVector. Some ethanol may have  
833 evaporated with escaping CO<sub>2</sub> or during sampling for apparent OD<sub>600</sub> measurement. Error bars  
834 are standard deviations of triplicate experiments.

835

836 **S5 Figure. Activity of cellular fractions of unadapted and adapted *Z. mobilis* GH3.** GH  
837 activity by different cellular fractions of the unadapted strain grown in RMG (A) and rich  
838 medium sucrose (B). Similarly, GH activity of different cellular fractions of cellobiose-adapted  
839 strain grown in RMCG (C), and GH activity of different cellular fractions of sucrose-adapted  
840 strain grown in RMCG (D). Abbreviations: Sup – supernatant, Peri – periplasmic fraction, Cyto  
841 – cytoplasmic fraction, Sph – spheroplast and Wcells – whole cells (cell pellets).

842

843 **S6 Figure. Cellobiose conversion (A), ethanol production (B) and sucrose metabolism (C)**  
844 **by unadapted *Z. mobilis* GH3, pVector control, and adapted *Z. mobilis* GH3 in an RMC**  
845 **medium with increasing concentrations of sucrose (0.2-0.8%).** *Z. mobilis* containing pVector  
846 and pGH3 (pVect-G and pGH3-G, respectively) were pregrown in RMG medium. Similarly, *Z.*  
847 *mobilis* containing pVector and pGH3 (pVect-S and pGH3-S, respectively) were pregrown in  
848 RMS medium or increasing concentrations of sucrose (0.2%S – 0.8%S) in RMC. Samples were  
849 assayed at 0, 6, 24, 48, and 72 hours (legend on right).



850

851 **S7 Figure. Extracellular and intracellular proteomics of *Z. mobilis* GH3 grown in cellobiose**

852 **and sucrose medium.** (A) Scatter plot of extracellular proteins of adapted strains grown on

853 cellobiose or sucrose versus glucose, and (B) scatter plot of intracellular proteins of adapted

854 strains grown on cellobiose or sucrose versus glucose. Proteins of interest are highlighted. Black

855 – proteins related to secretion and transport, Orange – glycosyl hydrolase (CC\_0968). (C) and

856 (D) Venn diagrams showing overlap between changes in proteins for cells grown on cellobiose

857 or sucrose versus glucose (adjusted  $p$ -value  $<0.001$ ).

858

859 **S8 Figure. Change in GH3 (CC\_0968) level in cellobiose- and sucrose-adapted *Z. mobilis***

860 **GH3.**

861

862 **S1 File. Quantitative proteomics data.**

A

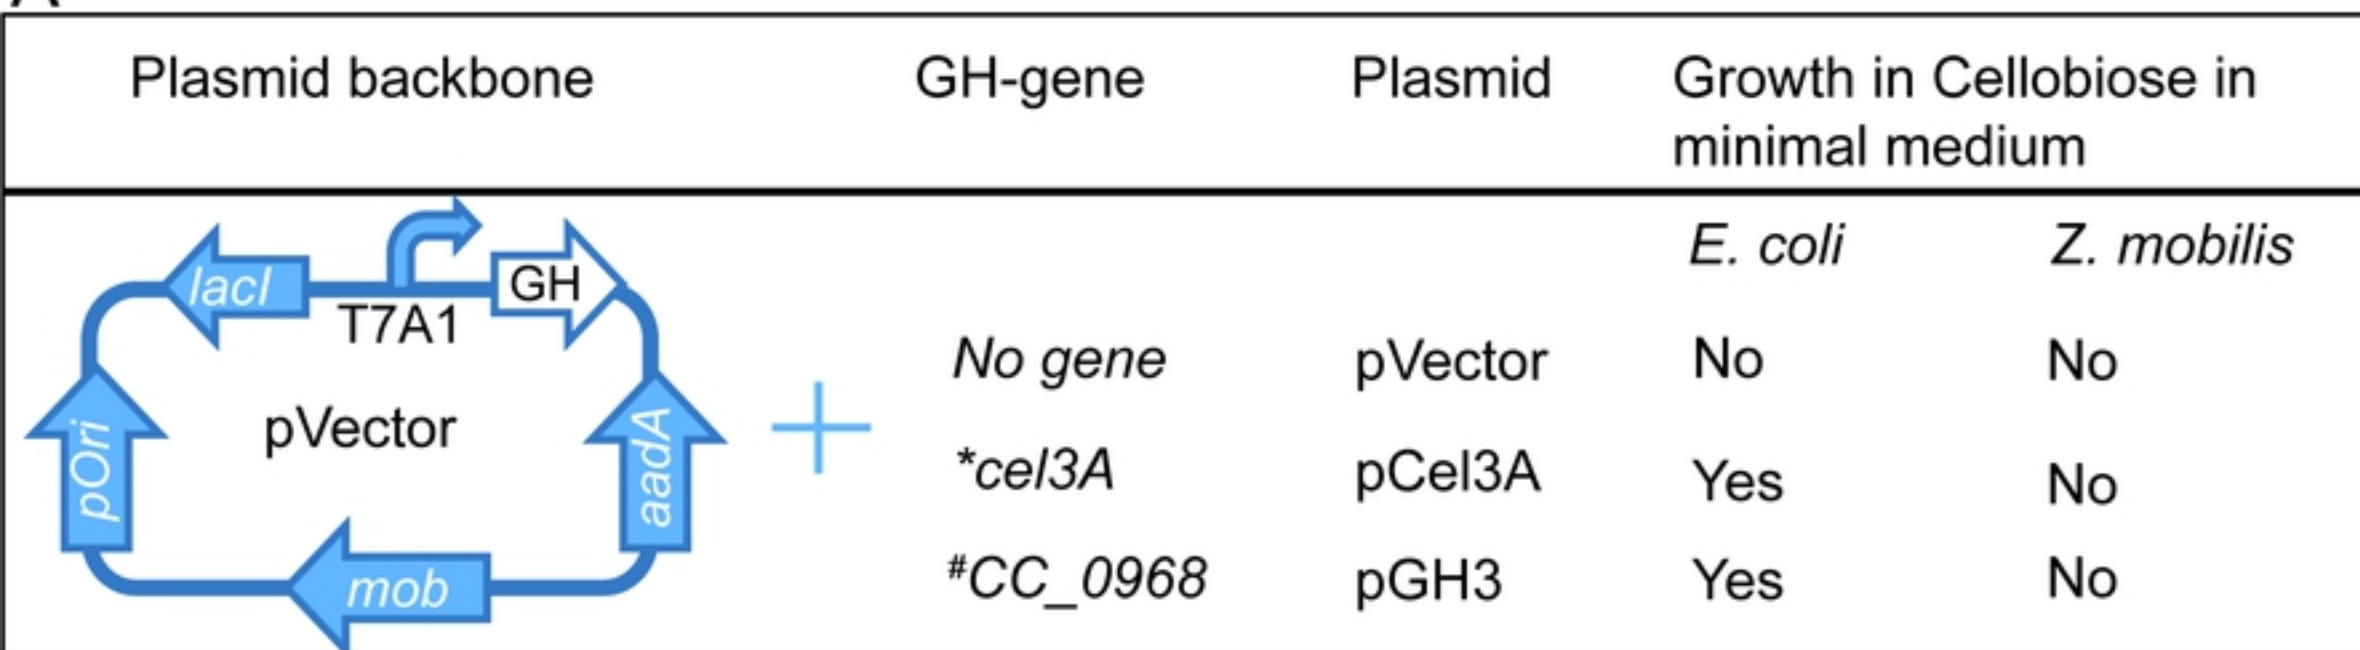

B

bioRxiv preprint doi: <https://doi.org/10.1101/854646>; this version posted November 25, 2019. The copyright holder for this preprint (which was not certified by peer review) is the author/funder, who has granted bioRxiv a license to display the preprint in perpetuity. It is made available under aCC-BY 4.0 International license.

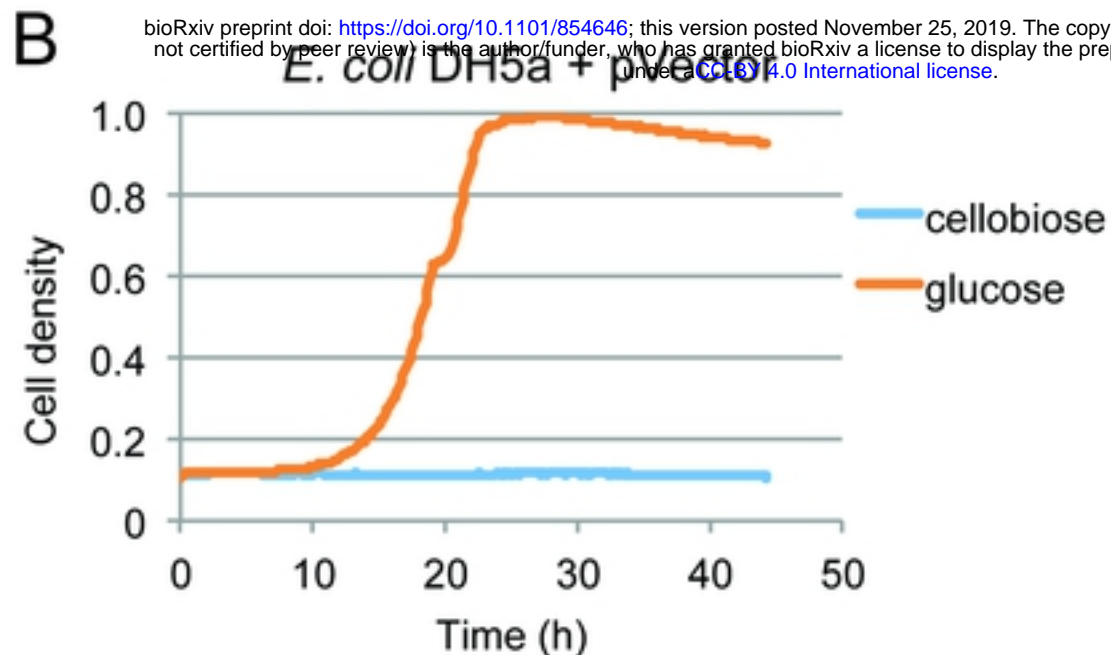

E

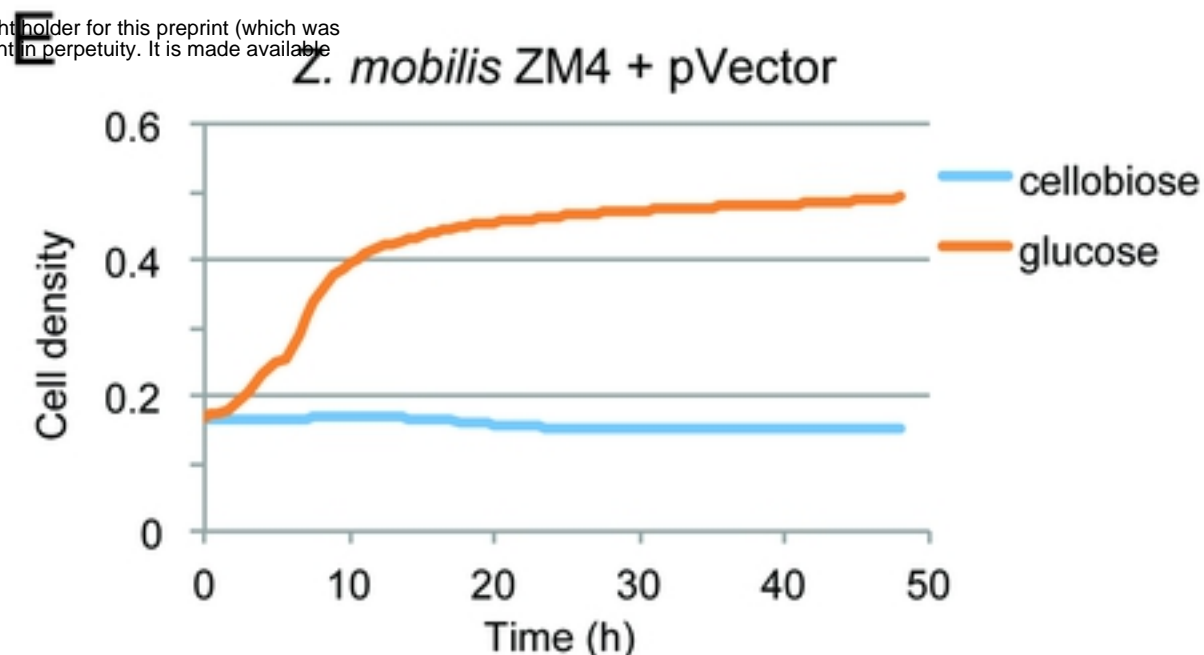

C

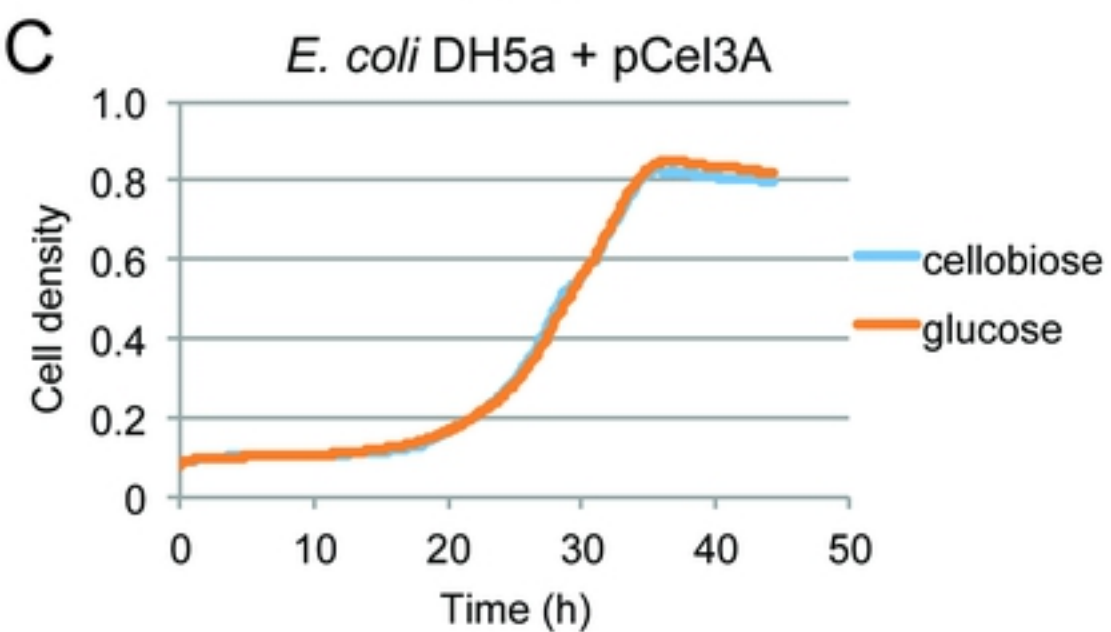

F

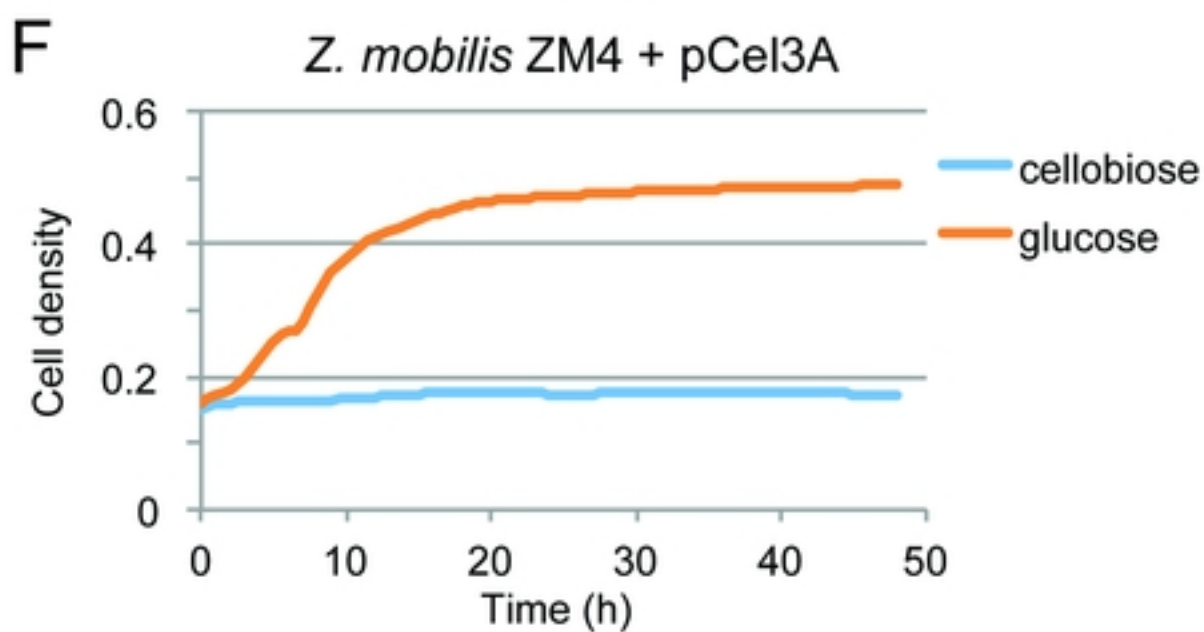

D

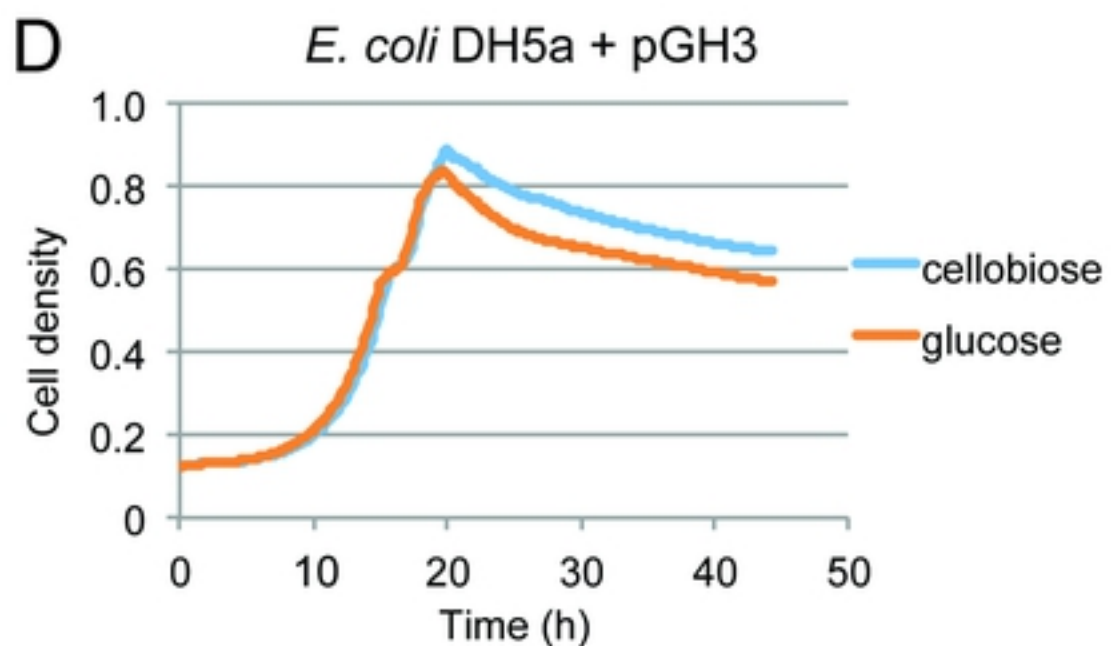

G

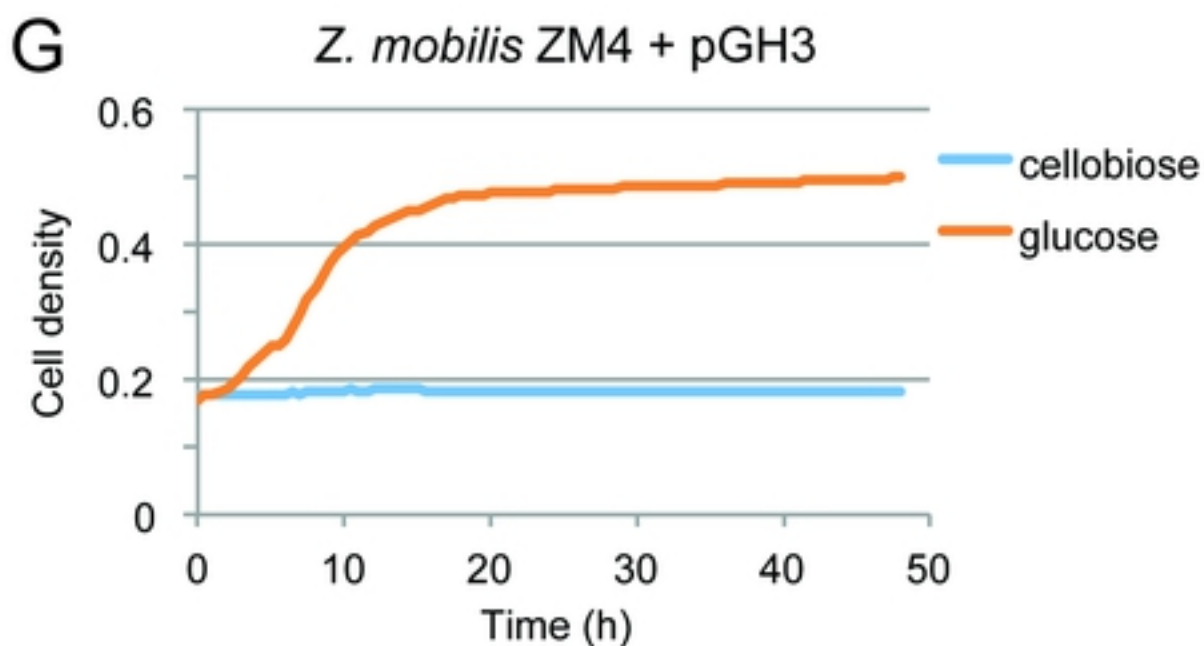

Figure 1

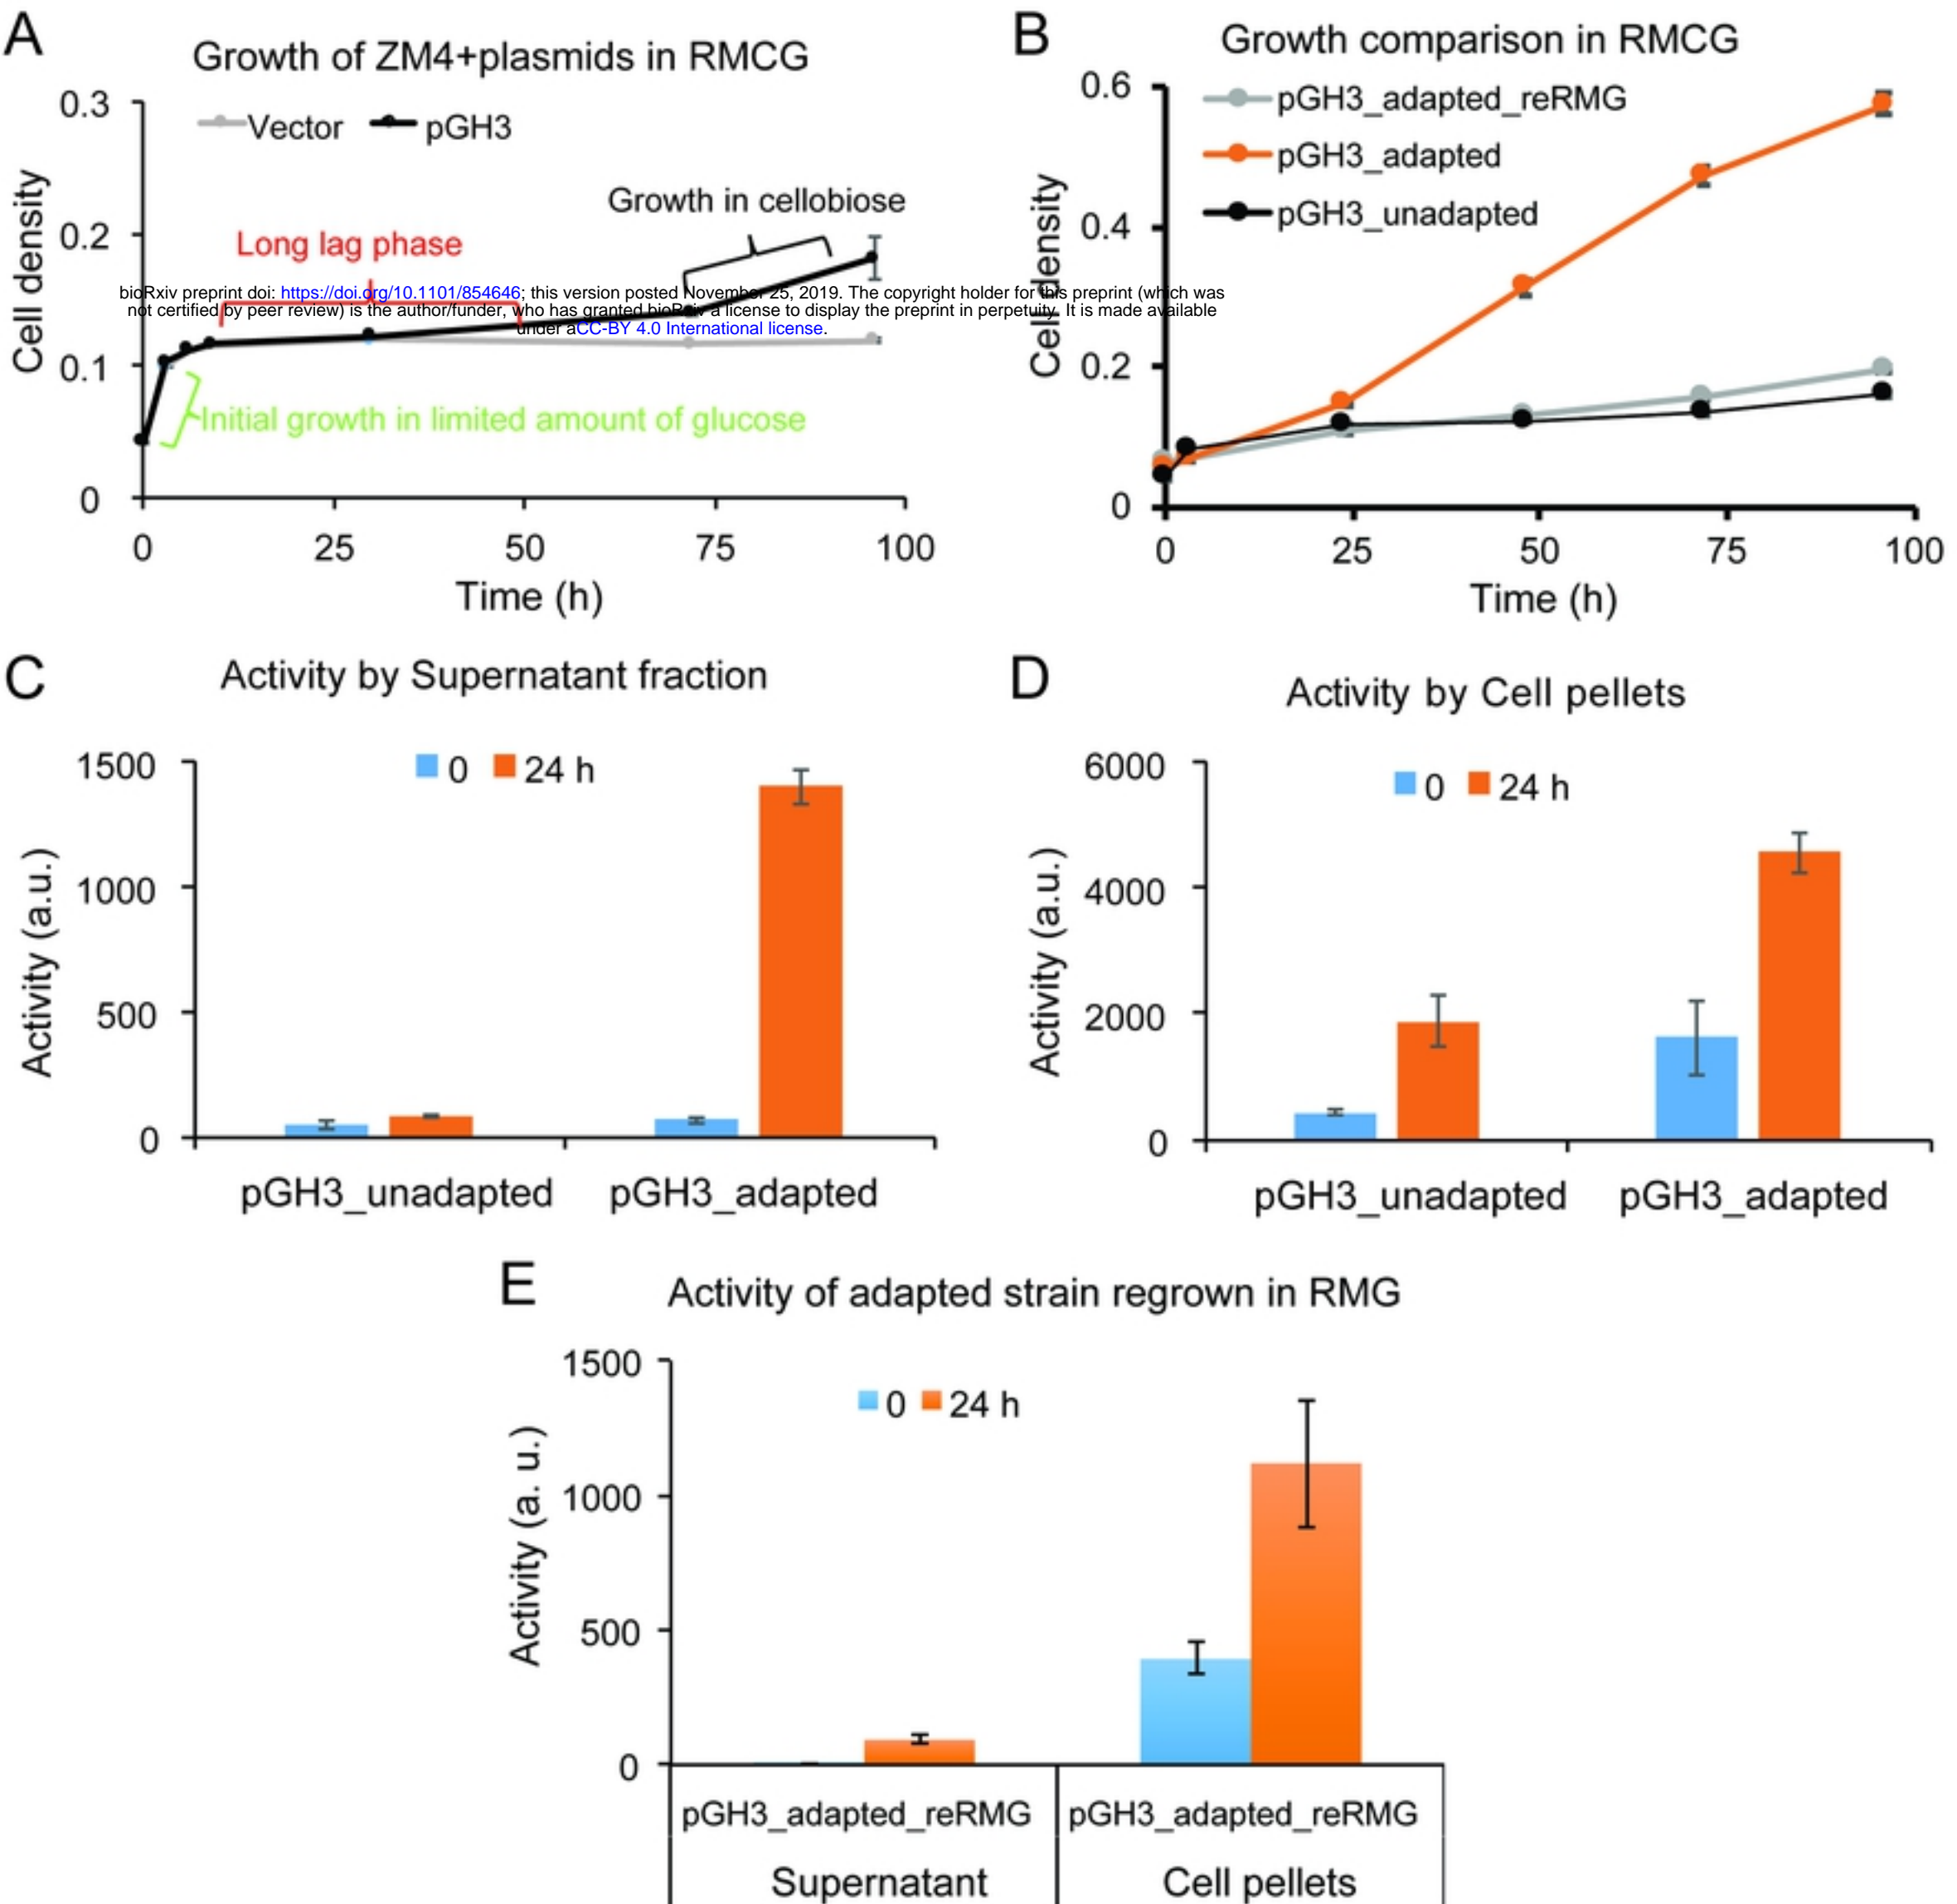

Figure 2

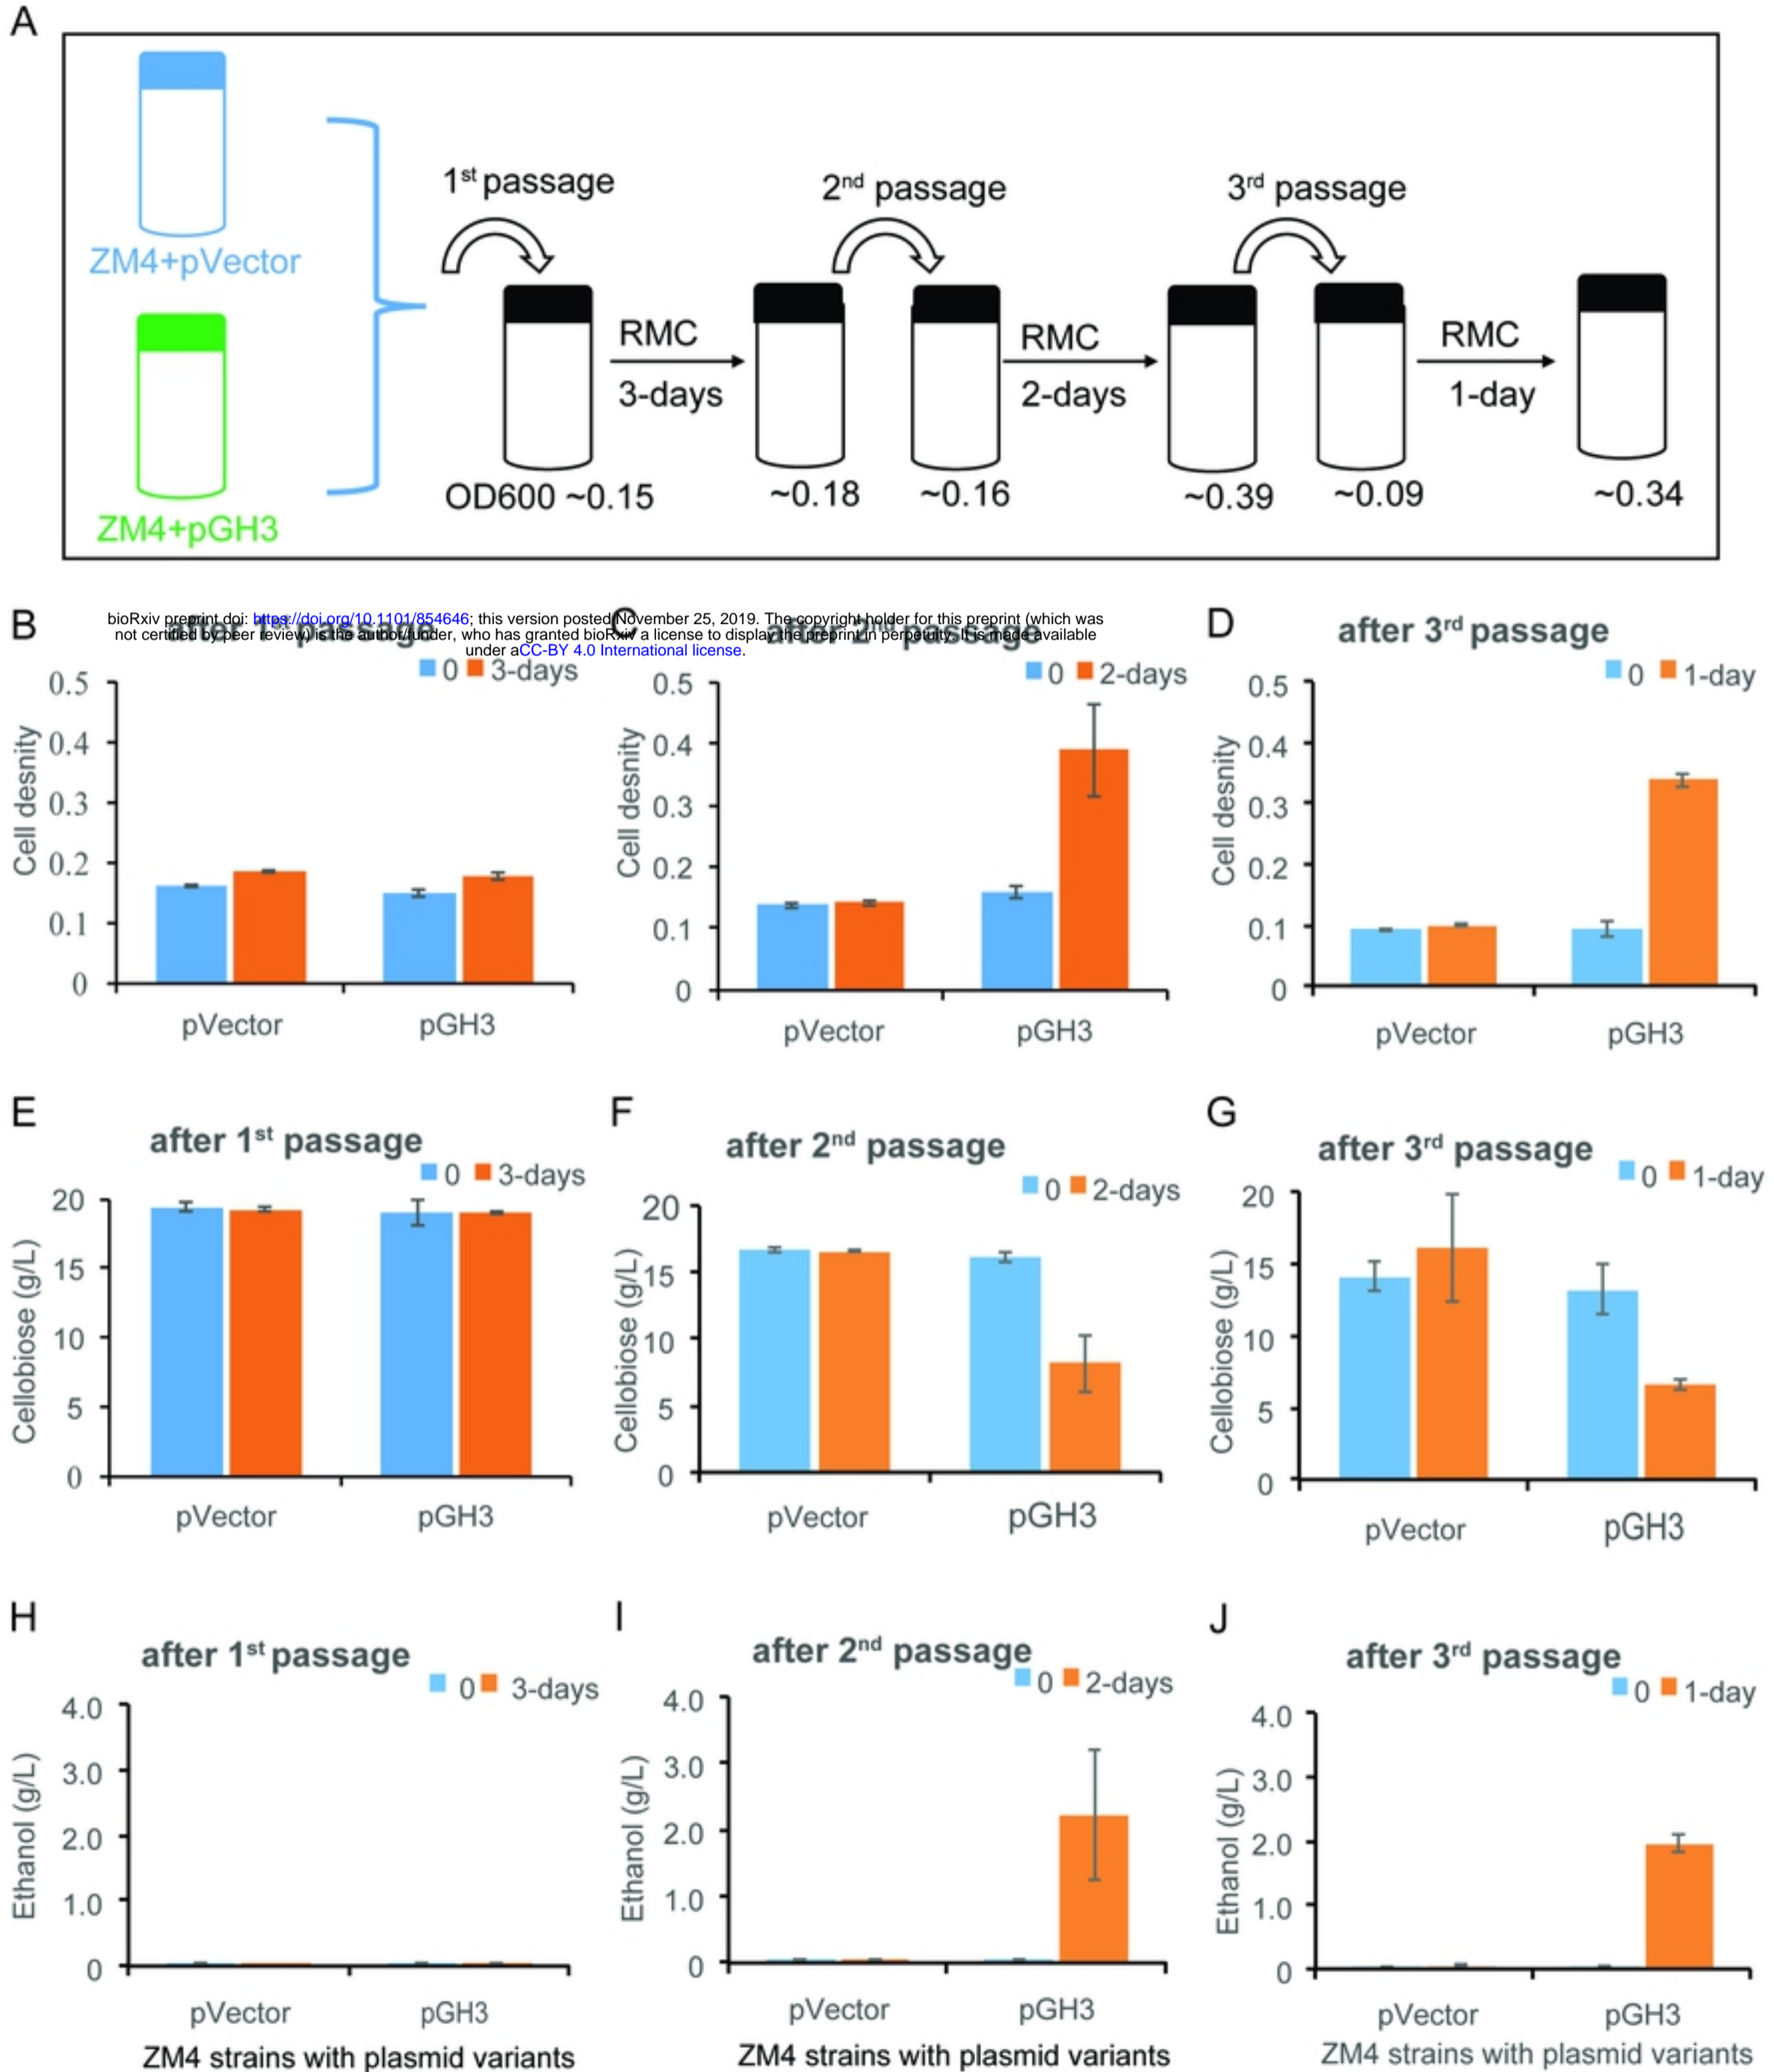

Figure 3

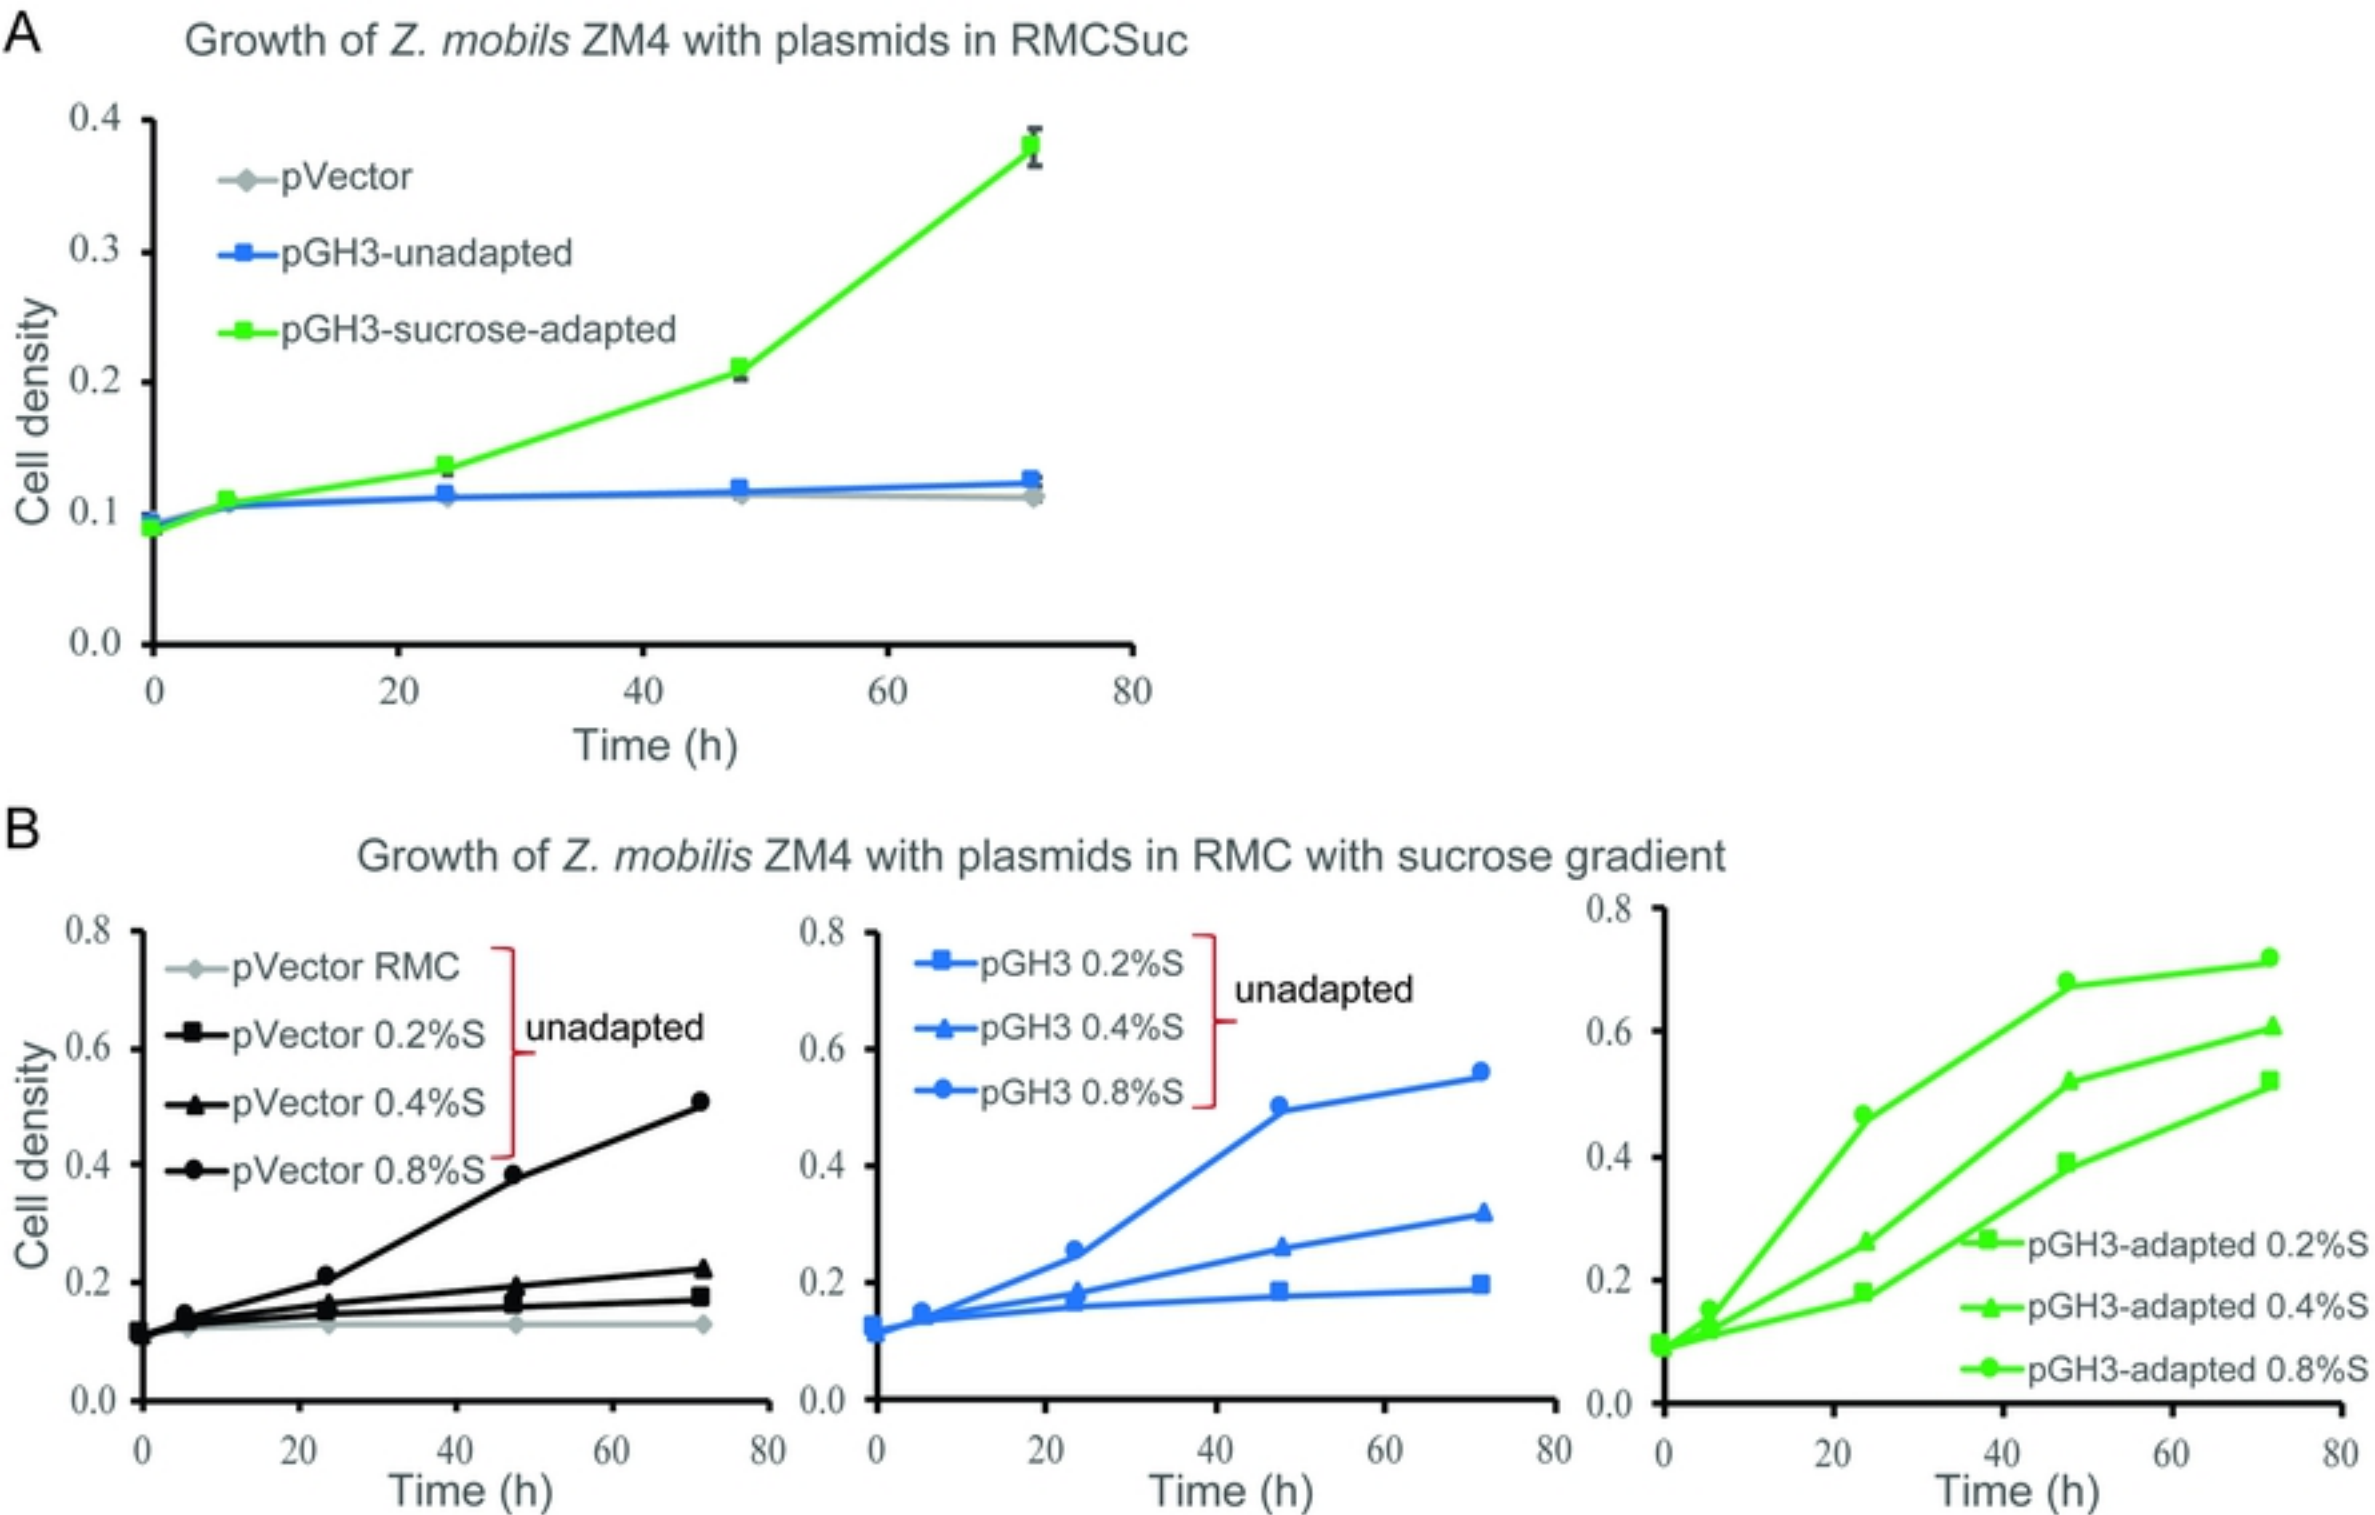

Figure 4

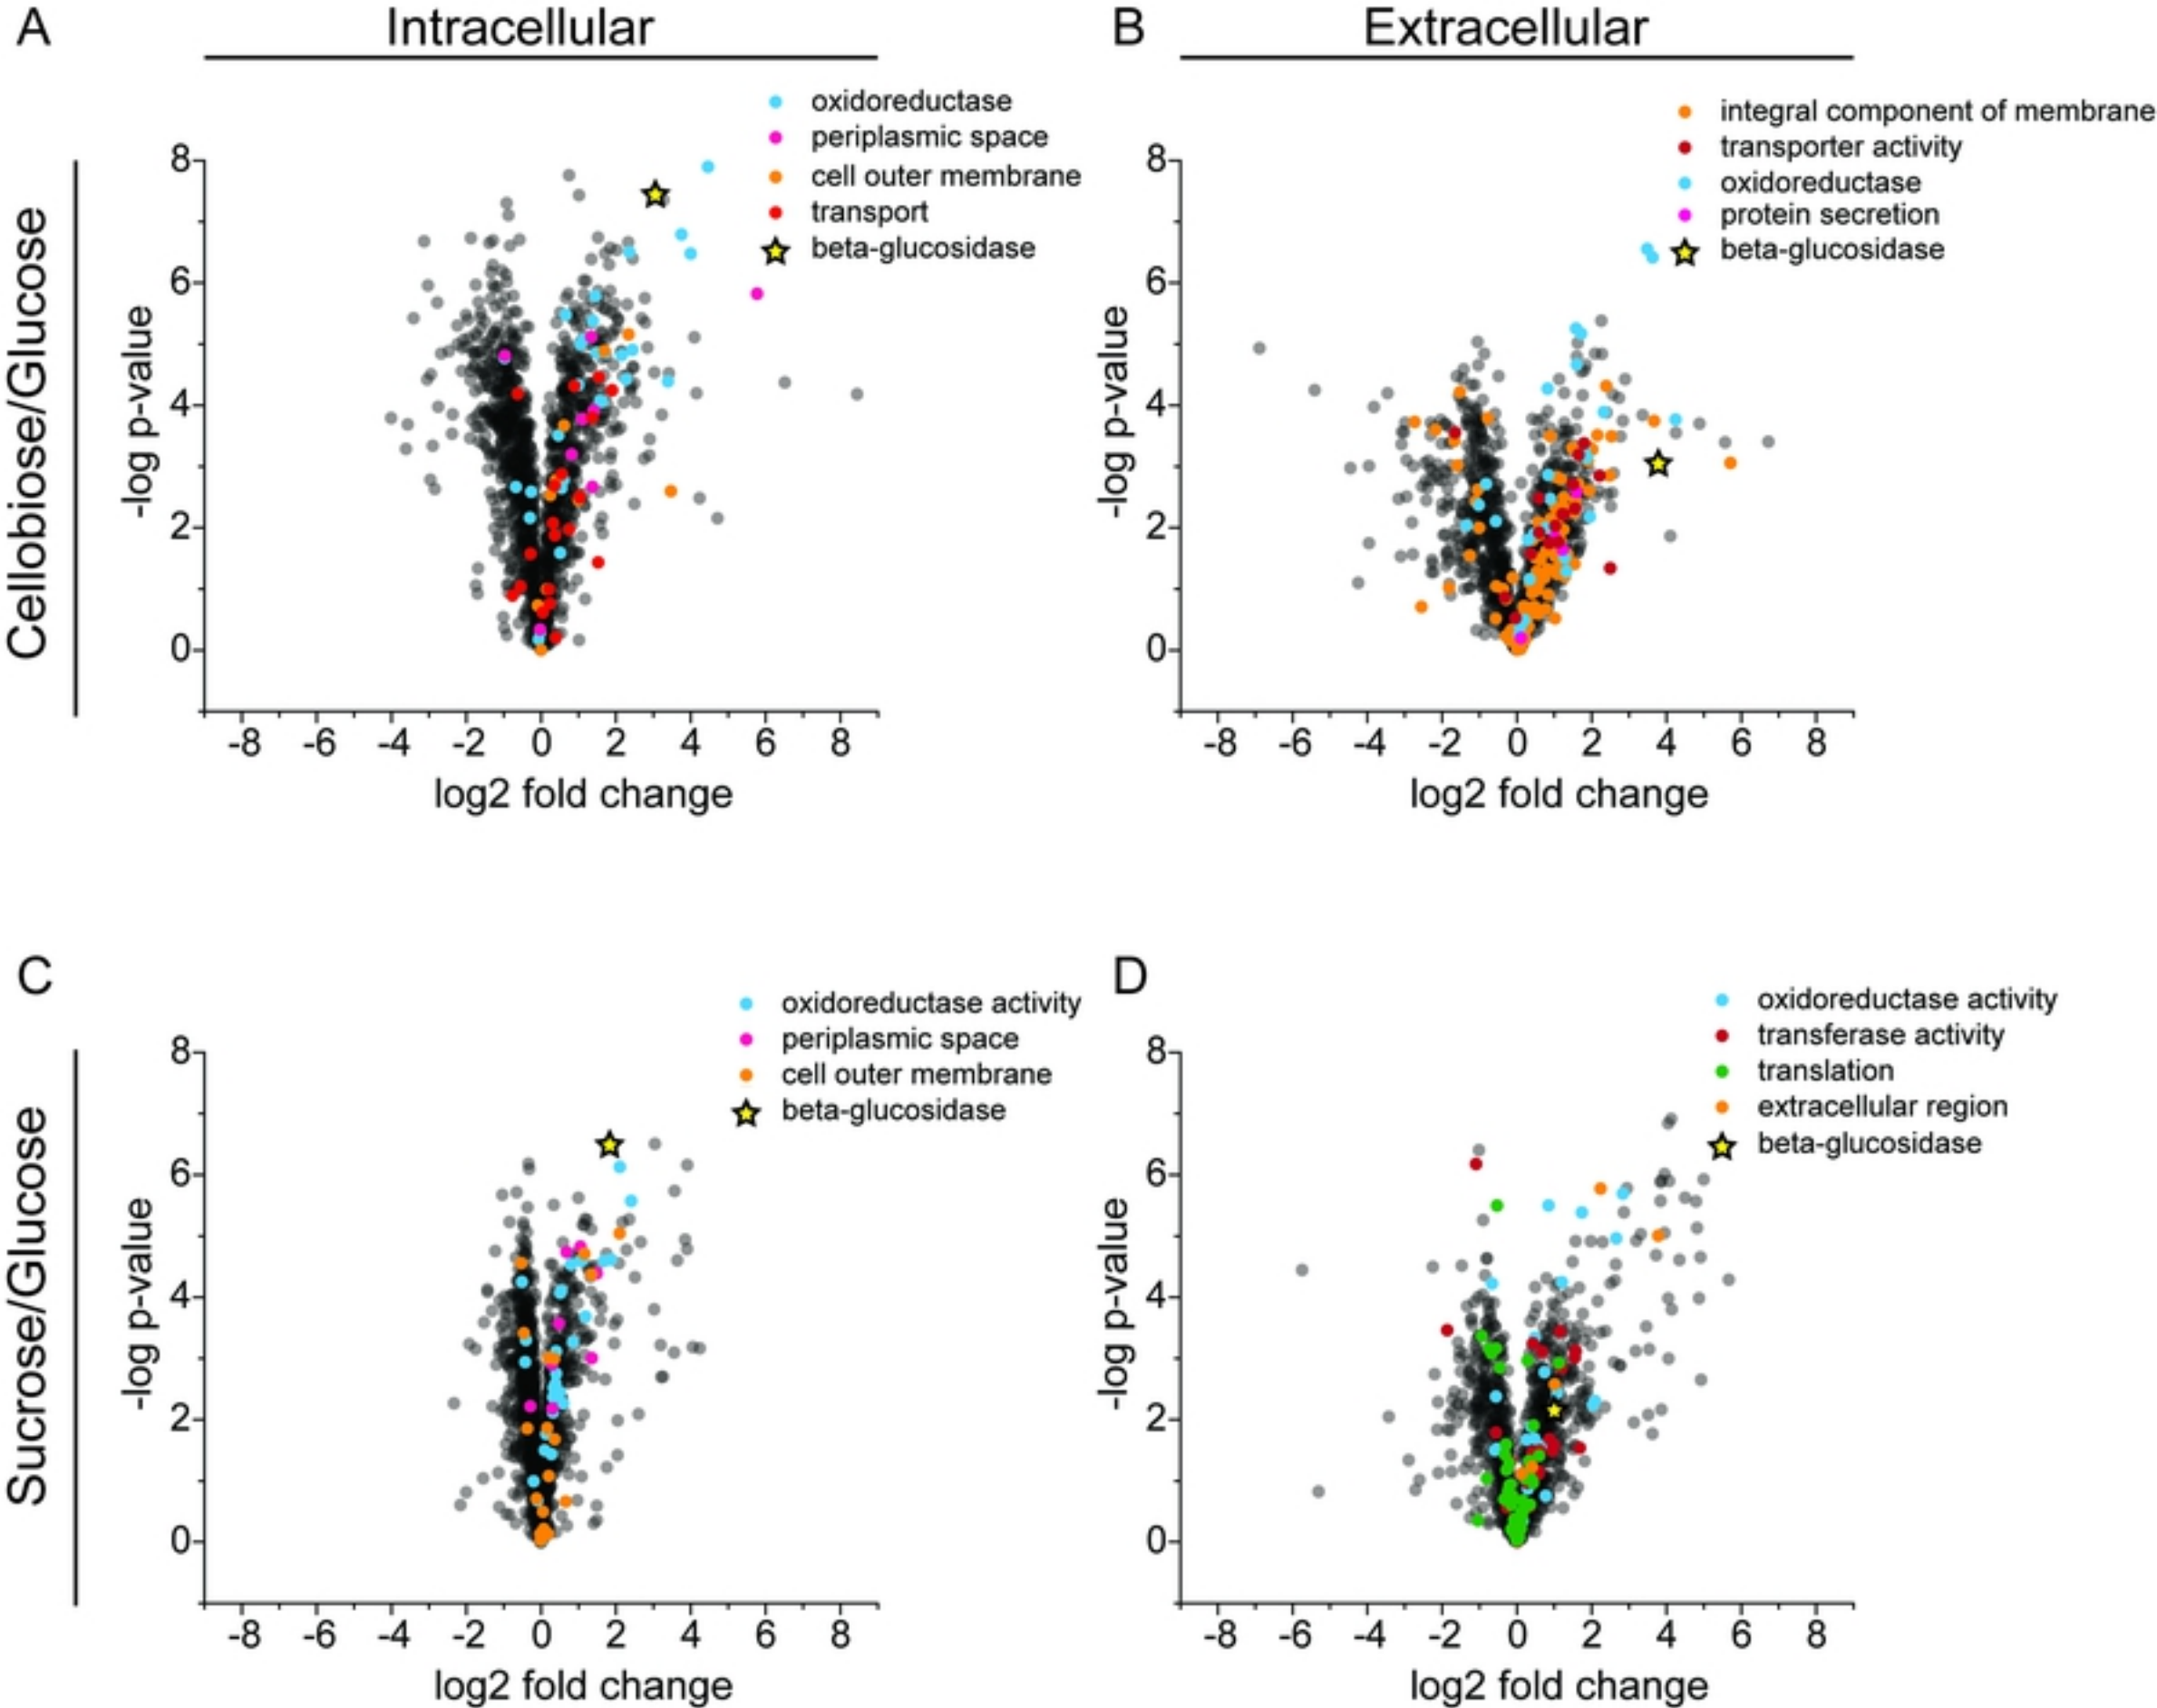

Figure 5

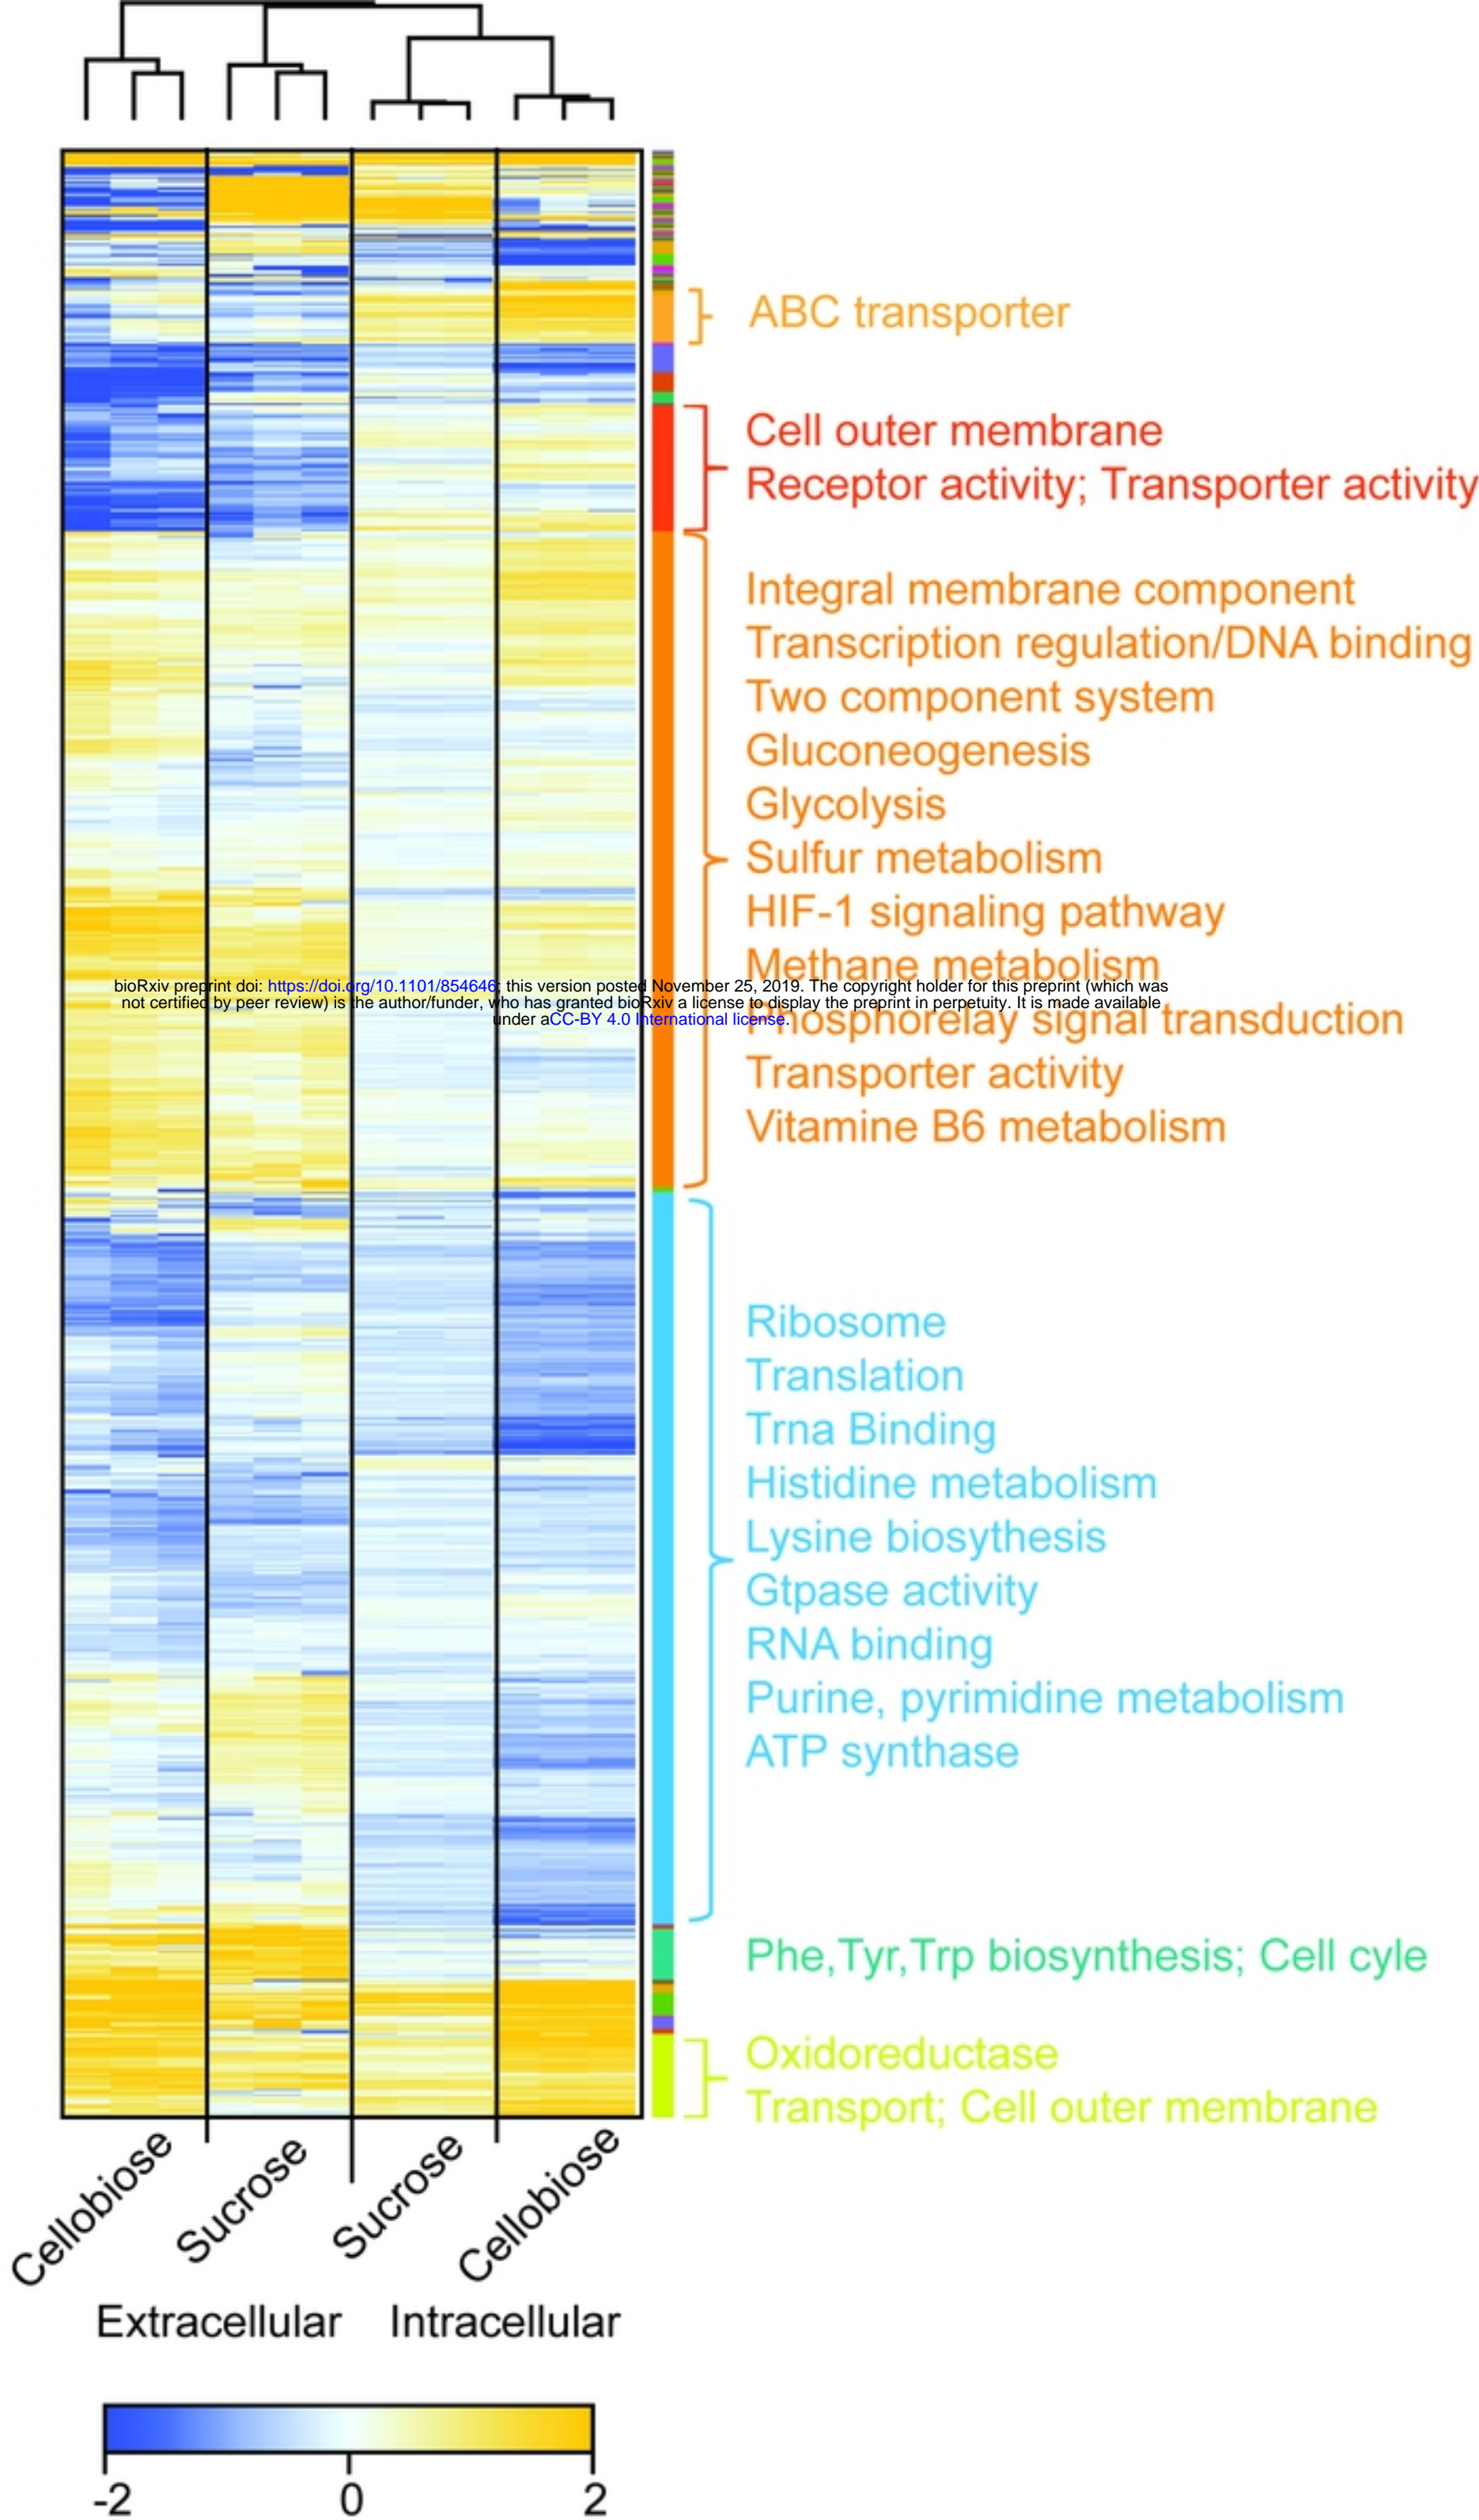

Figure 6
